# Supplementary material for: Solid-state and solution structures of hetero-aggregates formed between nBuLi and NCN pincer aryl lithium
Source: Royal Society of Chemistry journal article supplement (doi:10.1039/b805092a), 2008-01-01
Supplement: b805092a.pdf [file b805092a.pdf]

### Supplementary Information:

#### Experimental

All reactions were performed under an atmosphere of dry, oxygen-free nitrogen using Schlenk techniques or in a nitrogen-filled MBraun 150 G1 glovebox. Pentane was dried over Na sand and distilled under nitrogen. Toluene-d8 was purchased from Cambridge Isotopes, dried over Na/benzophenone, distilled prior to use and stored in the glovebox. 1D-NMR spectra [ $^1\text{H}$  (300.1 MHz),  $^{13}\text{C}$  (75.5 MHz) and  $^7\text{Li}$  (116.6 MHz)] were recorded on a Varian INova 300 spectrometer and 2D-NMR spectra ( $^1\text{H}$ - $^1\text{H}$  COSY,  $^1\text{H}$ - $^{13}\text{C}$  HETCOR) were recorded on a Varian INova 500 spectrometer. All NMR spectra were obtained in toluene-d8. Chemical shift values are reported in ppm ( $\delta$ ) and referenced internally to residual solvent signals ( $^1\text{H}$ ,  $^{13}\text{C}$ ) or externally ( $^7\text{Li}$ , 1.0 M LiCl in D<sub>2</sub>O,  $\delta = 0.00$ ). All reagents were purchased from Acros Chemicals and used as received. 1,3-bis(dimethylaminomethyl)benzene and 1,3-bis(diethylaminomethyl)benzene were synthesized via a modified literature procedure (D. Y. Curtin and E. W. Flynn, *J. Am. Chem. Soc.*, 1959, **81**, 4714) employing benzene as a solvent. The temperature of the NMR spectrometer was calibrated using 100% proteo-ethanol. Elemental analyses were performed by Dornis & Kolbe Microanalysis Laboratories, Mülheim a/d Ruhr, Germany.

**Alternate Synthesis of  $[\text{M}^{\text{c}}\text{NCNLi}]_2$  (**3**<sub>2</sub>):** To a solution of 1,3-bis(dimethylaminomethyl)benzene [ $^{\text{M}^{\text{c}}}\text{NCN}(\text{H})$ ] (1.62 g, 8.4 mmol) in dry pentane (100 ml) at  $-78^\circ\text{C}$  was added *n*BuLi (5.3 ml, 8.4 mmol, 1.6 M in hexanes) dropwise via syringe over 5 minutes. The reaction was allowed to stir at low temperature for 20 minutes and was subsequently slowly warmed to room temperature over three hours to give a yellow solution. The solvent was removed *in vacuo*, fresh dry pentane (120 ml) was added to the orange solid and then the solution was re-cooled to  $-78^\circ\text{C}$  for one hour without stirring. The resulting suspension was cold filtered and the collected solid was washed once with cold, dry pentane (10 ml). The solvent was removed *in vacuo* and the white solid dried *in vacuo* to give **3**<sub>2</sub> as a white, air sensitive powder. Yield: 1.31 g, 78%. NMR data are

consistent with those previously reported.<sup>9</sup>  $^1\text{H NMR}$  (25°C):  $\delta$  7.13 (t, 2H,  $^3J_{\text{HH}} = 7.2$  Hz, ArH), 6.99 (d, 4H,  $^3J_{\text{HH}} = 7.1$  Hz, ArH), 4.6-2.8 (br, 8H, benzylic CH<sub>2</sub>), 1.92 (s, 24H, N(CH<sub>3</sub>)<sub>2</sub>).  $^{13}\text{C}\{^1\text{H}\}$  NMR (25°C):  $\delta$  188.5 (septet,  $^1J_{\text{CLi}} = 21$  Hz, ArCLi), 151.7 (ArCCH<sub>2</sub>), 124.3 (*p*-ArC), 123.6 (*m*-ArC), 72.8 (benzylic CH<sub>2</sub>), 44.9 (br, N(CH<sub>3</sub>)<sub>2</sub>).  $^7\text{Li}\{^1\text{H}\}$  NMR (25°C):  $\delta$  0.96 (s).  $^1\text{H NMR}$  (-50°C):  $\delta$  7.27 (t, 2H,  $^3J_{\text{HH}} = 7.2$  Hz, ArH), 7.11 (d, 4H,  $^3J_{\text{HH}} = 7.2$  Hz, ArH), 4.06 (d, 4H,  $J_{\text{gem}} = 10.8$  Hz, benzylic CHH), 2.89 (d, 4H,  $J_{\text{gem}} = 11.4$  Hz, benzylic CHH), 1.94 (s, 12H, NCH<sub>3</sub>), 1.79 (s, 12H, NCH<sub>3</sub>).  $^{13}\text{C}\{^1\text{H}\}$  NMR (-50°C):  $\delta$  188.9 (septet,  $^1J_{\text{CLi}} = 21$  Hz, ArCLi), 152.2 (ArCCH<sub>2</sub>), 124.7 (*p*-ArC), 123.9 (*m*-ArC), 73.0 (benzylic CH<sub>2</sub>), 47.5 (N(CH<sub>3</sub>)<sub>2</sub>), 43.5 (N(CH<sub>3</sub>)<sub>2</sub>).  $^7\text{Li}\{^1\text{H}\}$  NMR (-50°C):  $\delta$  0.99 (s).

**Alternate Synthesis of [EtNCNLi]<sub>2</sub> (4<sub>2</sub>):** To a solution of 1,3-bis(diethylaminomethyl)benzene [EtNCN(H)] (3.92 g, 15.8 mmol) in dry pentane (100 ml) at -78°C was added *n*BuLi (9.9 ml, 15.8 mmol, 1.6 M in hexanes) dropwise via syringe over 5 minutes. The reaction was allowed to stir at low temperature for 20 minutes and was subsequently slowly warmed to room temperature over three hours to give a yellow solution. The solvent was removed *in vacuo*, fresh dry pentane (120 ml) was added to the orange solid and then the solution was re-cooled to -78°C for one hour without stirring. The resulting suspension was cold filtered and the collected solid was washed once with cold, dry pentane (10 ml). The solvent was removed *in vacuo* and the white solid dried *in vacuo* to give 4<sub>2</sub> as a white, air sensitive powder. Yield: 2.57 g, 64%. NMR data are consistent with those previously reported.<sup>10a</sup> The coalescence temperatures for the benzylic CH<sub>2</sub> and the terminal methyl groups of the NEt<sub>2</sub> were 11°C and -26°C, respectively.  $^1\text{H NMR}$  (25°C):  $\delta$  7.15 (t, 2H,  $^3J_{\text{HH}} = 6.9$  Hz, ArH), 7.02 (d, 4H,  $^3J_{\text{HH}} = 7.0$  Hz, ArH), 3.71 (br, 8H, benzylic CH<sub>2</sub>), 2.46 (br m, 16H, NCH<sub>2</sub>), 0.80 (t, 24H,  $^3J_{\text{HH}} = 7.2$  Hz, NCH<sub>2</sub>CH<sub>3</sub>).  $^{13}\text{C}\{^1\text{H}\}$  NMR (25°C):  $\delta$  189.9 (ArCLi, *J* not resolved), 151.5 (ArCCH<sub>2</sub>), 124.5 (*p*-ArC), 124.1 (*m*-ArC), 62.0 (benzylic CH<sub>2</sub>), 46.5 (br, NCH<sub>2</sub>), 9.0 (br, NCH<sub>2</sub>CH<sub>3</sub>).  $^7\text{Li}\{^1\text{H}\}$  NMR (25°C):  $\delta$  0.58 (s).  $^1\text{H NMR}$  (-50°C):  $\delta$  7.28 (t, 2H,  $^3J_{\text{HH}} = 7.3$  Hz, ArH), 7.14 (d, 4H,  $^3J_{\text{HH}} = 7.2$  Hz ArH), 4.12 (d, 4H,  $J_{\text{gem}} = 11.4$  Hz, benzylic CHH), 3.22 (d, 4H,  $J_{\text{gem}} = 11.7$  Hz, benzylic CHH), 2.53 (d of q, 4H,  $^3J_{\text{HH}} = 6.8$ ,  $J_{\text{gem}} = 14$  Hz, NCHH), 2.31 (m, 4H, NCHH), 2.17 (m, 8H, 2 x NCHH), 0.89 (t, 12H,  $^3J_{\text{HH}} = 6.8$  Hz,

$\text{NCH}_2\text{CH}_3$ ), 0.79 (t, 12H,  $^3J_{\text{HH}} = 6.9$  Hz,  $\text{NCH}_2\text{CH}_3$ ).  $^{13}\text{C}\{\text{H}\}$  NMR ( $-50^\circ\text{C}$ ):  $\delta$  190.0 (ArCLi,  $J$  not resolved), 151.4 (ArCCH<sub>2</sub>), 124.4 ( $p$ -ArC), 123.9 ( $m$ -ArC), 60.1 (benzylic CH<sub>2</sub>), 48.2 (NCH<sub>2</sub>), 44.6 (NCH<sub>2</sub>), 13.0 (NCH<sub>2</sub>CH<sub>3</sub>), 4.6 (NCH<sub>2</sub>CH<sub>3</sub>).  $^7\text{Li}\{\text{H}\}$  NMR ( $-50^\circ\text{C}$ ):  $\delta$  0.59 (s).

**Synthesis of  $[\text{Me}_4\text{NCNLi}]_2[n\text{BuLi}]_2$  ( $\mathbf{3}_2 \cdot [n\text{BuLi}]_2$ ):** To a solution of **3** (0.251 g, 1.27 mmol) in dry pentane (20 ml) at  $0^\circ\text{C}$  was added  $n\text{BuLi}$  (0.79 ml, 1.27 mmol, 1.6 M in hexanes) dropwise via syringe. The reaction was allowed to warm to room temperature for 2 hours. The solvent was removed *in vacuo* and the white solid obtained was dried *in vacuo* to yield a solid with composition  $[\text{Me}_4\text{NCNLi}][n\text{BuLi}]$  by elemental analysis. Yield 0.333g, 100%. Crystals for X-ray diffraction were obtained by cooling of a pentane solution to  $-35^\circ\text{C}$  for several weeks. *Anal.* Calcd: C 73.27, H 10.76, N 10.68. Found: C 73.10, H 10.71, N 10.73. Room temperature spectra of equilibrium mixture:  $^1\text{H}$  NMR ( $25^\circ\text{C}$ ):  $\delta$  7.13 (t,  $^3J_{\text{HH}} = 6.9$  Hz,  $\mathbf{3}_2$ ), 7.05 (t, 2H,  $^3J_{\text{HH}} = 7.6$  Hz, ArH), 6.97 (d,  $^3J_{\text{HH}} = 7.1$  Hz,  $\mathbf{3}_2$ ), 6.88 (d, 4H,  $^3J_{\text{HH}} = 7.4$  Hz, ArH), 3.45 (br, 8H, benzylic CH<sub>2</sub>) 1.92 (s, 24H, N(CH<sub>3</sub>)<sub>2</sub>) 1.58 (quintet, 4H,  $^3J_{\text{HH}} = 6.8$  Hz,  $n\text{BuCH}_2$ ), 1.46 (br, 4H,  $n\text{BuCH}_2$ ), 1.07 (t, 6H,  $^3J_{\text{HH}} = 7.0$  Hz,  $n\text{BuCH}_3$ ), -0.82 (br, 4H, LiCH<sub>2</sub>).  $^{13}\text{C}\{\text{H}\}$  NMR ( $25^\circ\text{C}$ ):  $\delta$  188.7 ( $J$  not resolved,  $\mathbf{3}_2$ ), 179.5 (br, ArCLi), 151.7 (ArCCH<sub>2</sub>,  $\mathbf{3}_2$ ), 151.5 (ArCCH<sub>2</sub>), 127.1 ( $m$ - and  $p$ -ArC), 124.3 ( $p$ -ArC,  $\mathbf{3}_2$ ), 123.6 ( $m$ -ArC,  $\mathbf{3}_2$ ), 72.8 benzylic CH<sub>2</sub>,  $\mathbf{3}_2$ ), 70.0 (benzylic CH<sub>2</sub>), 45.1 (br, NCH<sub>3</sub>), 44.6 (v. br, NCH<sub>3</sub>,  $\mathbf{3}_2$ ), 32.8, (br,  $n\text{BuCH}_2$ ), 32.5 (v. br,  $n\text{BuCH}_2$ ), 14.0 ( $n\text{BuCH}_3$ ), 9.9 (v. br, LiCH<sub>2</sub>).  $^7\text{Li}\{\text{H}\}$  NMR ( $25^\circ\text{C}$ ):  $\delta$  1.07 (s,  $\mathbf{3}_2$ ), 0.38 (v. br). LT NMR data given for signals corresponding to  $\mathbf{3} \cdot [n\text{BuLi}]_2$  only.  $^1\text{H}$  NMR ( $-50^\circ\text{C}$ ):  $\delta$  7.14 (m, 2H, ArH), 6.95 (d, 2H,  $^3J_{\text{HH}} = 7.1$  Hz, ArH), 6.93 (d, 2H,  $^3J_{\text{HH}} = 7.1$  Hz, ArH), 4.44 (d, 2H,  $J_{\text{gem}} = 11.7$  Hz, benzylic CHH), 3.89 (d, 2H,  $J_{\text{gem}} = 12.6$  Hz, benzylic CHH), 2.87 (d, 2H,  $J_{\text{gem}} = 11.1$  Hz, benzylic CHH), 2.56 (d, 2H,  $J_{\text{gem}} = 12.9$  Hz, benzylic CHH), 2.30 (s, 6H, NCH<sub>3</sub>), 1.82 (s, 12H, 2 x NCH<sub>3</sub>), 1.74 (s, 6H, NCH<sub>3</sub>), 1.49 (br, 8H, 2 x  $n\text{BuCH}_2$ ), 1.18 (t, 6H,  $^3J_{\text{HH}} = 7.0$  Hz,  $n\text{BuCH}_3$ ), -0.30 (br m, 2H, LiCHH), -0.54 (br m, 2H, LiCHH).  $^{13}\text{C}\{\text{H}\}$  NMR ( $-50^\circ\text{C}$ ):  $\delta$  178.8 (ArCLi,  $J$  not resolved), 152.1 (ArCCH<sub>2</sub>), 150.5 (ArCCH<sub>2</sub>), 127.0-126.8 ( $m$ - and  $p$ -ArC), 70.3 (benzylic CH<sub>2</sub>), 68.7 (benzylic CH<sub>2</sub>), 46.6 (NCH<sub>3</sub>), 45.0 (NCH<sub>3</sub>), 43.1 (NCH<sub>3</sub>), 42.5 (NCH<sub>3</sub>), 33.8 ( $n\text{BuCH}_2$ ), 33.2 ( $n\text{BuCH}_2$ ), 14.4 ( $n\text{BuCH}_3$ ), 10.9 (v. br, LiCH<sub>2</sub>).  $^7\text{Li}\{\text{H}\}$  NMR ( $-50^\circ\text{C}$ ):  $\delta$  0.87 (s, 2Li), 0.44 (s, 2Li).

**Synthesis of  $[\text{Et}^{\text{t}}\text{NCNLi}]_2[n\text{BuLi}]_2$  ( $\mathbf{4}_2 \cdot [n\text{BuLi}]_2$ ):** To a solution of **4** (0.380 g, 0.75 mmol) in dry pentane (15 ml) at 0°C was added *n*BuLi (0.47 ml, 0.75 mmol, 1.6 M in hexanes) dropwise via syringe. The reaction was allowed to warm to room temperature for 2 hours. The solvent was removed *in vacuo* and the white solid obtained was dried *in vacuo* to yield a solid with composition  $[\text{Et}_4\text{NCNLi}]_2[n\text{BuLi}]_2$  by elemental analysis. Yield 0.468g, 98.5%. Crystals for X-ray diffraction were obtained by cooling of a pentane solution to -35°C for several days. *Anal.* Calcd: C 75.68, H 11.12, N 8.83. Found: C 75.53, H 11.02, N 8.65. Room temperature spectra of equilibrium mixture:  $^1\text{H}$  NMR (25°C):  $\delta$  7.13 (t,  $^3J_{\text{HH}} = 6.6$  Hz, ArH,  $\mathbf{4}_2$ ), 7.10 (t, 2H,  $^3J_{\text{HH}} = 6.7$  Hz, ArH), 7.02 (d,  $^3J_{\text{HH}} = 7.2$  Hz, ArH,  $\mathbf{4}_2$ ), 6.95 (d, 4H,  $^3J_{\text{HH}} = 7.1$  Hz, ArH), 3.68 (br, 8H, benzylic CH<sub>2</sub>), 2.49-2.43 (br m, 16H, NCH<sub>2</sub>CH<sub>3</sub>), 1.61 (br, 8H, 2 x *n*BuCH<sub>2</sub>), 1.11 (t, 6H,  $^3J_{\text{HH}} = 7.1$  Hz, *n*BuCH<sub>3</sub>), 0.80 (t, 24H,  $^3J_{\text{HH}} = 7.2$  Hz, NCH<sub>2</sub>CH<sub>3</sub>), -0.67 (br, 4H, LiCH<sub>2</sub>).  $^{13}\text{C}\{^1\text{H}\}$  NMR (25°C):  $\delta$  189.8 (septet,  $^1J_{\text{CLi}} = 19.8$  Hz,  $\mathbf{4}_2$ ), 179.7 (br, ArCLi), 151.5 (ArCCH<sub>2</sub>,  $\mathbf{4}_2$ ), 151.1 (ArCCH<sub>2</sub>), 126.8 (*m*- and *p*-ArC), 124.5 (*p*-ArC,  $\mathbf{4}_2$ ), 124.0 (*m*-ArC,  $\mathbf{4}_2$ ), 64.3 (benzylic CH<sub>2</sub>), 62.0 (benzylic CH<sub>2</sub>,  $\mathbf{4}_2$ ), 46.5 (br, NCH<sub>2</sub>CH<sub>3</sub>,  $\mathbf{4}_2$ ), 43.6 (br, NCH<sub>2</sub>CH<sub>3</sub>), 33.1 (*n*BuCH<sub>2</sub>), 32.8 (*n*BuCH<sub>2</sub>), 14.0 (*n*BuCH<sub>3</sub>), 9.8 (br, LiCH<sub>2</sub>), 8.9 (br, NCH<sub>2</sub>CH<sub>3</sub>).  $^7\text{Li}\{^1\text{H}\}$  NMR (25°C):  $\delta$  0.59 (s,  $\mathbf{4}_2$ ), 0.37 (br). LT NMR data given for signals corresponding to  $\mathbf{4}_2 \cdot [n\text{BuLi}]_2$  only.  $^1\text{H}$  NMR (-50°C):  $\delta$  7.21 (t, 2H  $^3J_{\text{HH}} = 7.2$  Hz, ArH), 7.07 (d, 2H,  $^3J_{\text{HH}} = 7.4$  Hz, ArH), 6.96 (d, 2H,  $^3J_{\text{HH}} = 7.4$  Hz, ArH), 4.47 (d, 2H,  $J_{\text{gem}} = 12.0$  Hz, benzylic CHH), 3.93 (d, 2H,  $J_{\text{gem}} = 12.0$  Hz, benzylic CHH), 3.77 (d, 2H,  $J_{\text{gem}} = 12.0$  Hz, benzylic CHH), 3.15 (d, 2H,  $J_{\text{gem}} = 12.0$  Hz, benzylic CHH), 3.03 (m, 2H, NCH(H)CH<sub>3</sub>), 2.68-2.52 (m, 10H, 5 x NCH(H)CH<sub>3</sub>), 2.18 (m, 4H, 2 x NCH(H)CH<sub>3</sub>), 1.76 (br, 8H, 2 x *n*BuCH<sub>2</sub>), 1.28 (t, 6H,  $^3J_{\text{HH}} = 6.3$  Hz, *n*BuCH<sub>3</sub>), 1.12 (t, 6H,  $^3J_{\text{HH}} = 6.0$  Hz, NCH<sub>2</sub>CH<sub>3</sub>), 0.91 (t, 6H,  $^3J_{\text{HH}} = 6.0$  Hz, NCH<sub>2</sub>CH<sub>3</sub>), 0.61 (t, 6H,  $^3J_{\text{HH}} = 6.0$  Hz, NCH<sub>2</sub>CH<sub>3</sub>), 0.48 (t, 6H,  $^3J_{\text{HH}} = 6.0$  Hz, NCH<sub>2</sub>CH<sub>3</sub>), -0.21 (br, 2H, LiCHH), -0.34 (br, 2H, LiCHH).  $^{13}\text{C}\{^1\text{H}\}$  NMR (-50°C):  $\delta$  180.1 (ArCLi, *J* not resolved), 151.7 (ArCCH<sub>2</sub>), 150.0 (ArCCH<sub>2</sub>), 126.8 (*m*-ArC), 126.7 (*m*-ArC), 125.2 (*p*-ArC), 64.3 (benzylic CH<sub>2</sub>), 62.5 (benzylic CH<sub>2</sub>), 45.7 (NCH<sub>2</sub>), 44.8 (NCH<sub>2</sub>), 44.6 (NCH<sub>2</sub>), 39.0 (NCH<sub>2</sub>), 34.3 (*n*BuCH<sub>2</sub>), 33.4 (*n*BuCH<sub>2</sub>), 14.4 (*n*BuCH<sub>3</sub>), 11.9 (2x NCH<sub>2</sub>CH<sub>3</sub>), 9.5 (br, LiCH<sub>2</sub>) 4.4 (NCH<sub>2</sub>CH<sub>3</sub>), 3.8 (NCH<sub>2</sub>CH<sub>3</sub>).  $^7\text{Li}\{^1\text{H}\}$  NMR (-50°C):  $\delta$  0.76 (s, 2Li), 0.10 (s, 2Li).

**In situ generation of [<sup>Me</sup>NCNLi][*n*BuLi]<sub>3</sub> (6):** In the glovebox, **3** (25.9 mg, 0.13 mmol) was weighed into an NMR tube and toluene-*d*<sub>8</sub> (~ 0.5 ml) was added. To this was added a prepared solution of *n*BuLi (0.073 ml, 0.39 mmol, 5.3 M in toluene-*d*<sub>8</sub>) via syringe and the tube was capped with a septa and shaken. Unlike **7**, signals for dimer **3** and **3**•[*n*BuLi]<sub>2</sub> were readily apparent in the room temperature NMR spectra (see above for discussion). NMR data for signals corresponding to **6** only: <sup>1</sup>H NMR (25°C): δ 7.05 (t, 1H, <sup>3</sup>J<sub>HH</sub>= 7.5 Hz, ArH), 6.88 (d, 2H, <sup>3</sup>J<sub>HH</sub>= 7.5 Hz, ArH), 3.47 (v. br, 4H, benzylic CH<sub>2</sub>), 1.92 (br, 12H, N(CH<sub>3</sub>)<sub>2</sub>), 1.54-1.42 (m, 12H, 2 x *n*BuCH<sub>2</sub>), 1.04 (t, 9H, <sup>3</sup>J<sub>HH</sub>= 7.1 Hz, *n*BuCH<sub>3</sub>), -0.86 (br, 6H, LiCH<sub>2</sub>). <sup>13</sup>C{<sup>1</sup>H} NMR (25°C): δ 177.9 (ArCLi, *J* not resolved), 151.7 (ArCCH<sub>2</sub>), 127.1 (*m*- and *p*-ArC), 70.0 (benzylic CH<sub>2</sub>), 44.5 (br, N(CH<sub>3</sub>)<sub>2</sub>), 32.5 (br, *n*BuCH<sub>2</sub>), 32.0 (br, *n*BuCH<sub>2</sub>), 14.0 (br, *n*BuCH<sub>3</sub>), 10.4 (v. br, LiCH<sub>2</sub>). <sup>7</sup>Li{<sup>1</sup>H} NMR (25°C): δ 1.06 (**3**), 0.05 (v. br). LT NMR data for signals corresponding to **6** only: <sup>1</sup>H NMR (-50°C): δ 7.15 (m, 1H, ArH), 6.90 (d, 2H, <sup>3</sup>J<sub>HH</sub>= 7.5 Hz, ArH), 4.11 (d, 2H, *J*<sub>gem</sub> = 11.7 Hz, benzylic CHH), 2.74 (d, 2H, *J*<sub>gem</sub> = 12.0 Hz, benzylic CHH), 2.17 (s, 6H, NCH<sub>3</sub>), 1.73 (s, 6H, NCH<sub>3</sub>), 1.66 (m, 6H, *n*BuCH<sub>2</sub>), 1.39 (m, 6H, *n*BuCH<sub>2</sub>), 1.17 (t, 9H, <sup>3</sup>J<sub>HH</sub>= 6.8 Hz, *n*BuCH<sub>3</sub>), -0.63 (br, 2H, LiCH<sub>2</sub>), -0.76 (br, 2H, LiCH<sub>2</sub>), -1.03 (br, 2H, LiCH<sub>2</sub>). <sup>13</sup>C{<sup>1</sup>H} NMR (-50°C): δ 178.2 (ArCLi, *J* not resolved), 151.7 (ArCCH<sub>2</sub>), 126.9 (*m* and *p*-ArC), 69.5 (benzylic CH<sub>2</sub>), 46.1 (NCH<sub>3</sub>), 42.5 (NCH<sub>3</sub>), 32.9 (2 x *n*BuCH<sub>2</sub>), 14.2 (*n*BuCH<sub>3</sub>), 9.6 (v. br, 2 x LiCH<sub>2</sub>), 8.3 (v. br, LiCH<sub>2</sub>). <sup>7</sup>Li{<sup>1</sup>H} NMR (-50°C): δ 0.44 (s, 2Li), 0.07 (s, 1Li), -1.36 (s, 1Li).

**Synthesis of [<sup>Et</sup>NCNLi][*n*BuLi]<sub>3</sub> (7):** To a solution of **4** (0.207 g, 0.40 mmol) in dry pentane (30 ml) at 0°C was added *n*BuLi (2.03 ml, 3.26 mmol, 1.6 M in hexanes, 4 equiv./ Et<sub>4</sub>NCNLi) dropwise via syringe over 5 minutes. The reaction was warmed to room temperature over 2 hours and the solvent was removed *in vacuo* to yield a light yellow that solidifies on standing. Yield: 0.401 g, 96.9% based on composition [<sup>Et</sup>NCN]*n*Bu<sub>3</sub>Li<sub>4</sub> + one additional *n*BuLi, which was confirmed by integration of the <sup>1</sup>H NMR spectrum. Attempts to obtain crystals from concentrated pentane solutions were unsuccessful. <sup>1</sup>H NMR (25°C): δ 7.09 (t, 1H, <sup>3</sup>J<sub>HH</sub>= 7.5 Hz, ArH), 6.94 (d, 2H, <sup>3</sup>J<sub>HH</sub> = 7.2 Hz), 3.66 (br, 4H benzylic CH<sub>2</sub>), 2.61 (br, 4H, NCH<sub>2</sub>CH<sub>3</sub>), 2.40 (virtual quintet, 4H, <sup>3</sup>J<sub>HH</sub>

= 6.8 Hz,  $\text{NCH}_2\text{CH}_3$ ), 1.57 (m, 12H,  $n\text{BuCH}_2$ ), 1.08 (t, 9H,  ${}^3J_{\text{HH}} = 6.9$  Hz,  $n\text{BuCH}_3$ ), 0.82 (br, 12H,  $\text{NCH}_2\text{CH}_3$ ), -0.79 (br s, 6H,  $\text{LiCH}_2$ ).  ${}^7\text{Li}\{^1\text{H}\}$  NMR (25°C):  $\delta$  0.02 (br s).  ${}^1\text{H}$  NMR (-50°C):  $\delta$  7.17 (t, 1H,  ${}^3J_{\text{HH}} = 7.4$  Hz)  $\text{ArH}$ , 6.97 (d, 2H,  ${}^3J_{\text{HH}} = 7.8$  Hz), 3.94 (d, 2H,  $J_{\text{gem}} = 12$  Hz, benzylic  $\text{CHH}$ ), 3.36 (d, 2H,  $J_{\text{gem}} = 13$  Hz, benzylic  $\text{CHH}$ ), 2.80 (virtual quintet, 2H,  ${}^3J_{\text{HH}} = 7.2$ ,  $\text{NCHH}$ ), 2.50 (m, 2H,  $\text{NCHH}$ ), 2.38 (m, 4H, 2 x  $\text{NCHH}$ ), 1.70 (br, 8H,  $n\text{BuCH}_2$ ), 1.51 (br, 4H,  $n\text{BuCH}_2$ ), 1.19 (t, 9H,  ${}^3J_{\text{HH}} = 6.8$  Hz,  $n\text{BuCH}_3$ ), 1.01 (t, 6H,  ${}^3J_{\text{HH}} = 6.9$  Hz,  $\text{NCH}_2\text{CH}_3$ ), 0.57 (t, 6H,  ${}^3J_{\text{HH}} = 6.9$  Hz,  $\text{NCH}_2\text{CH}_3$ ), -0.56 (br, 2H,  $\text{LiCH}_2$ ), -0.68 (br, 2H,  $\text{LiCH}_2$ ), -1.02 (br, 2H,  $\text{LiCH}_2$ ).  ${}^{13}\text{C}\{^1\text{H}\}$  NMR (-50°C):  $\delta$  179.4 ( $\text{ArCLi}$ ,  $J$  not resolved), 151.1 ( $\text{ArCCH}_2$ ), 126.8 ( $m\text{-ArCH}$ ), 125.6 ( $p\text{-ArCH}$ ), 63.8 (benzylic  $\text{CH}_2$ ), 45.8 ( $\text{NCH}_2$ ), 39.1 ( $\text{NCH}_2$ ), 33.1 ( $n\text{BuCH}_2$ ), 32.9 ( $n\text{BuCH}_2$ ), 14.1 ( $n\text{BuCH}_3$ ), 11.8 ( $\text{NCH}_2\text{CH}_3$ ), 9.5 (br,  $\text{LiCH}_2$ ), 5.2 ( $\text{NCH}_2\text{CH}_3$ ).  ${}^7\text{Li}\{^1\text{H}\}$  NMR (-50°C):  $\delta$  0.54 (s, 2Li), 0.08 (s, 1Li), -1.29 (s, 1Li).

**Dynamic processes involving  $3_2$  and  $4_2$ :**

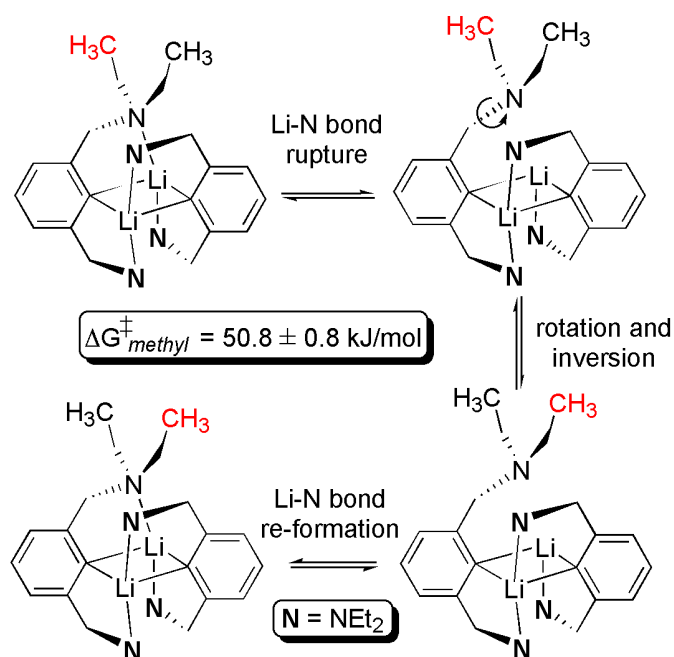

**Figure S1:** Depiction of process for exchange of  $\text{NEt}_2$  groups ( $\Delta G_{\text{methyl}}^{\ddagger}$ )

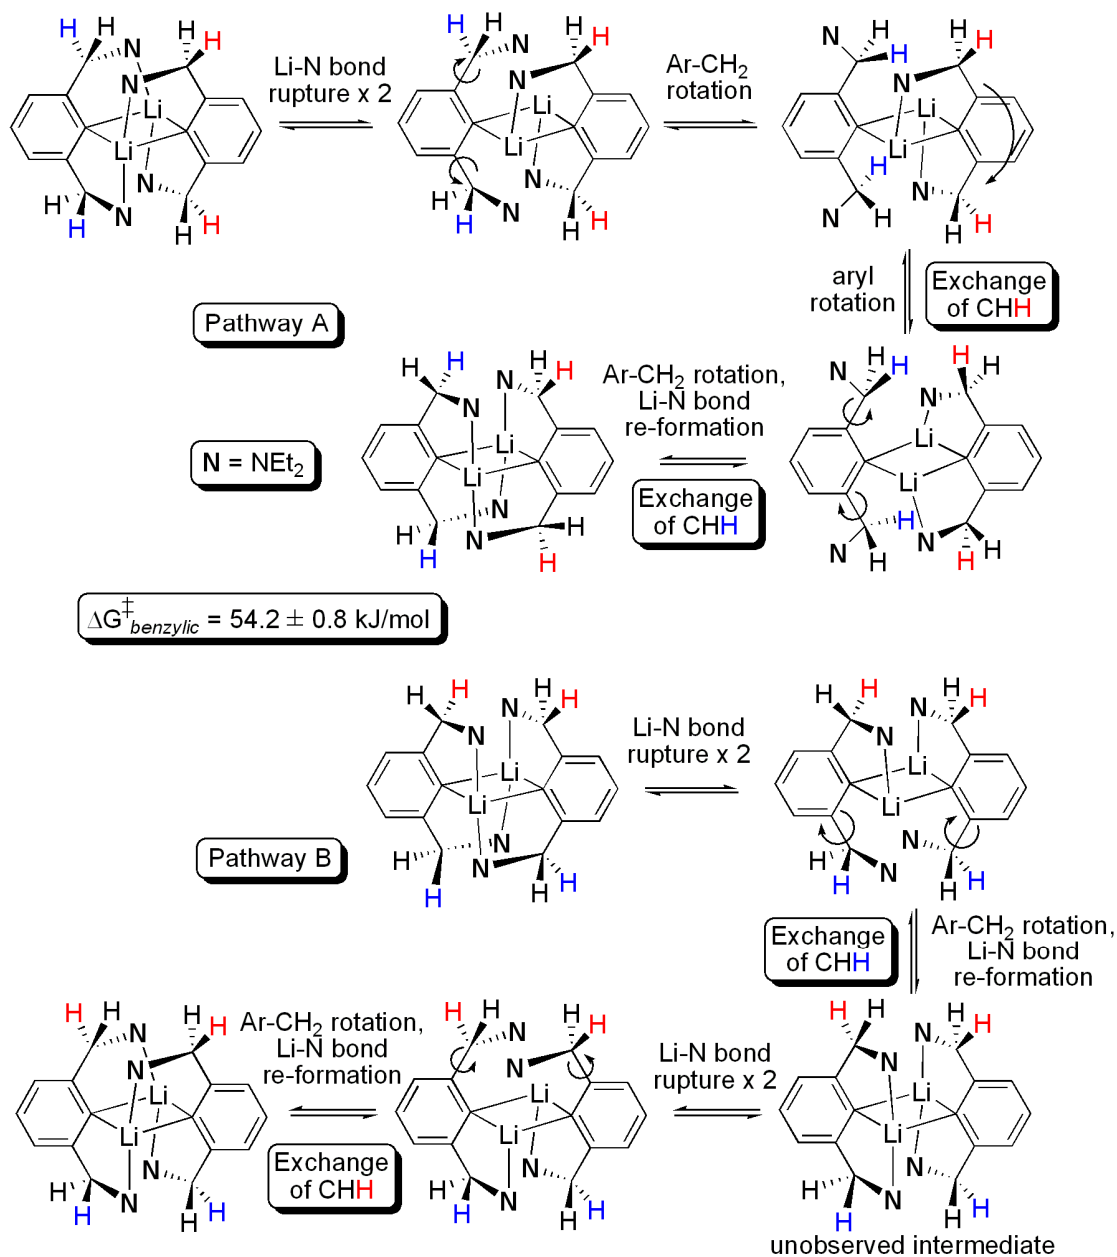

**Figure S2:** Depiction of processes for exchange of benzylic ArCH<sub>2</sub>N protons ( $\Delta G^{\ddagger}_{benzylic}$ )

**Representative NMR spectra of aggregates containing [M<sup>c</sup>NCN] pincers (3-series):**

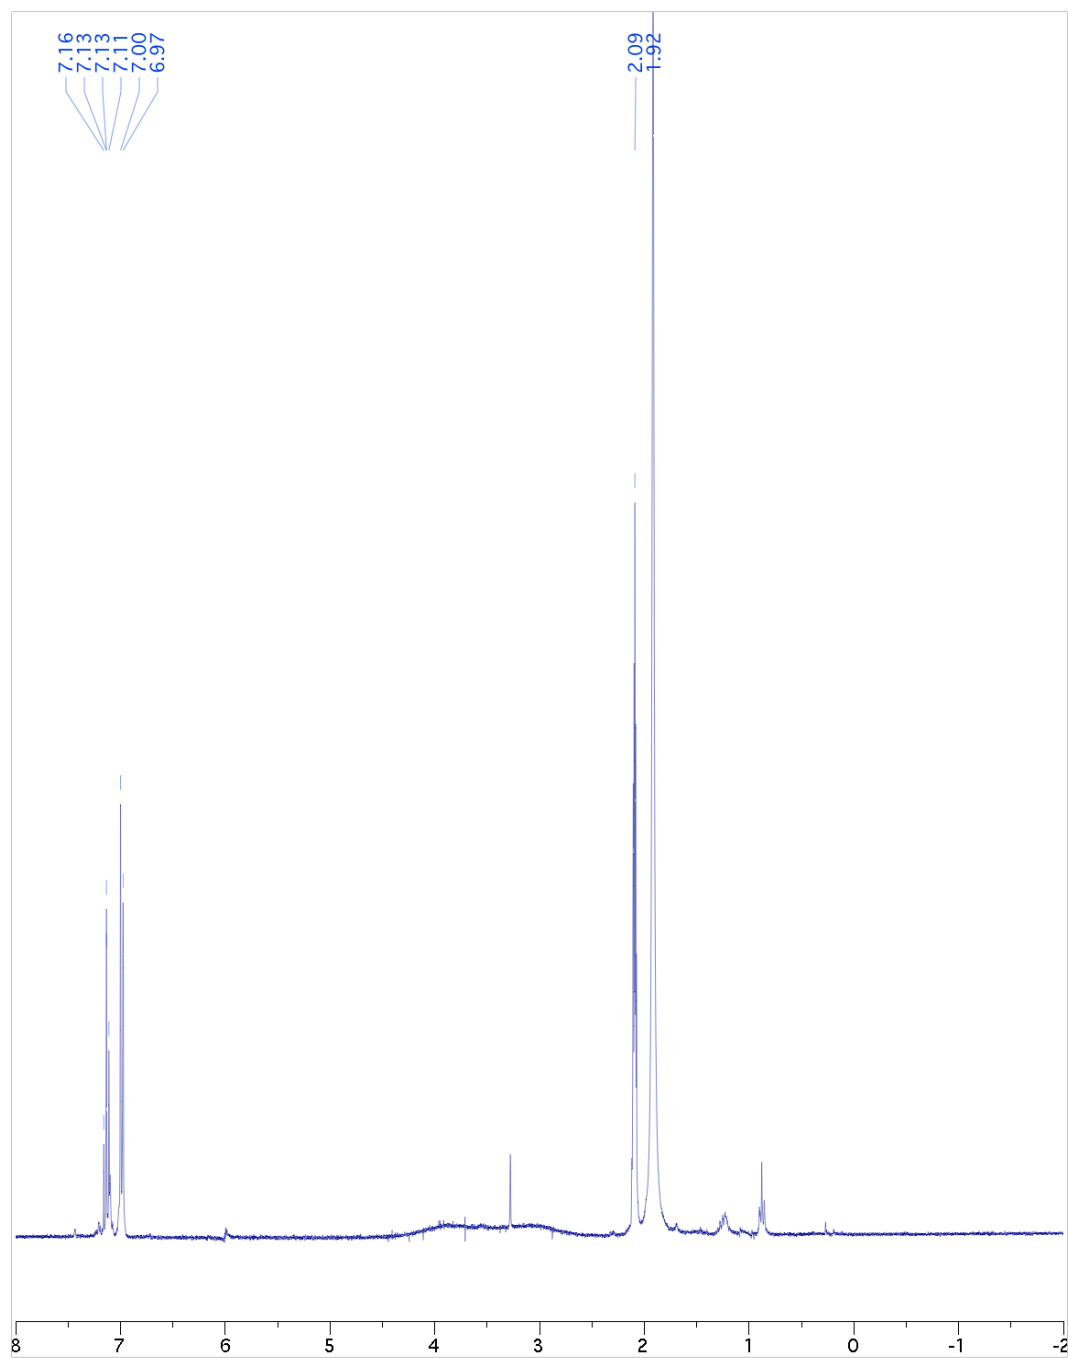

**Figure S3:**  $^1\text{H}$  NMR spectrum of  $\mathbf{3}_2$  at RT.



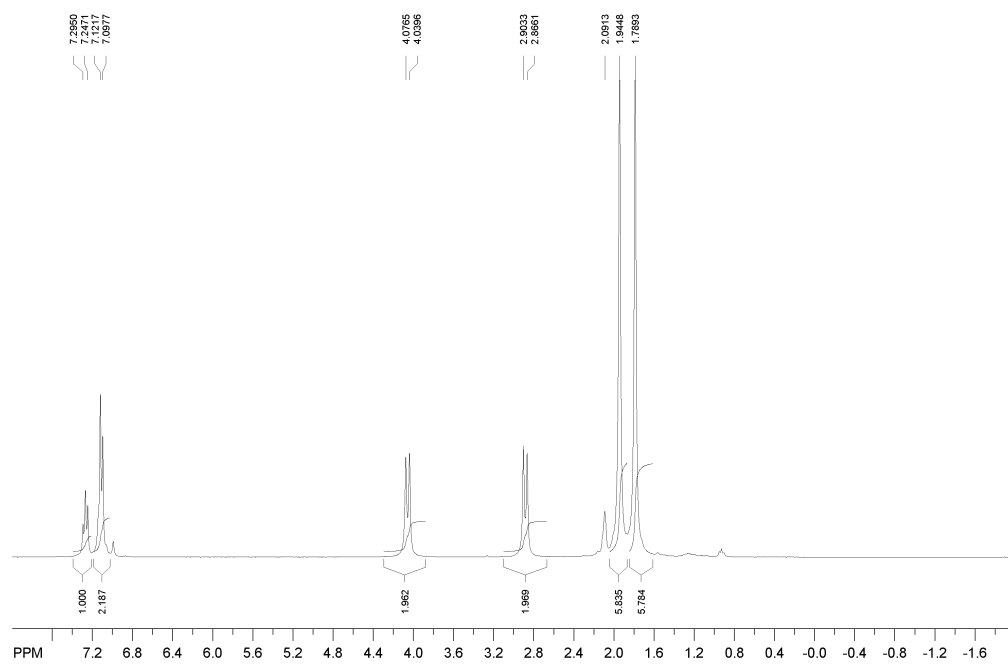

**Figure S4:**  $^1\text{H}$  NMR spectrum of  $\mathbf{3}_2$  at  $-50^\circ\text{C}$ .

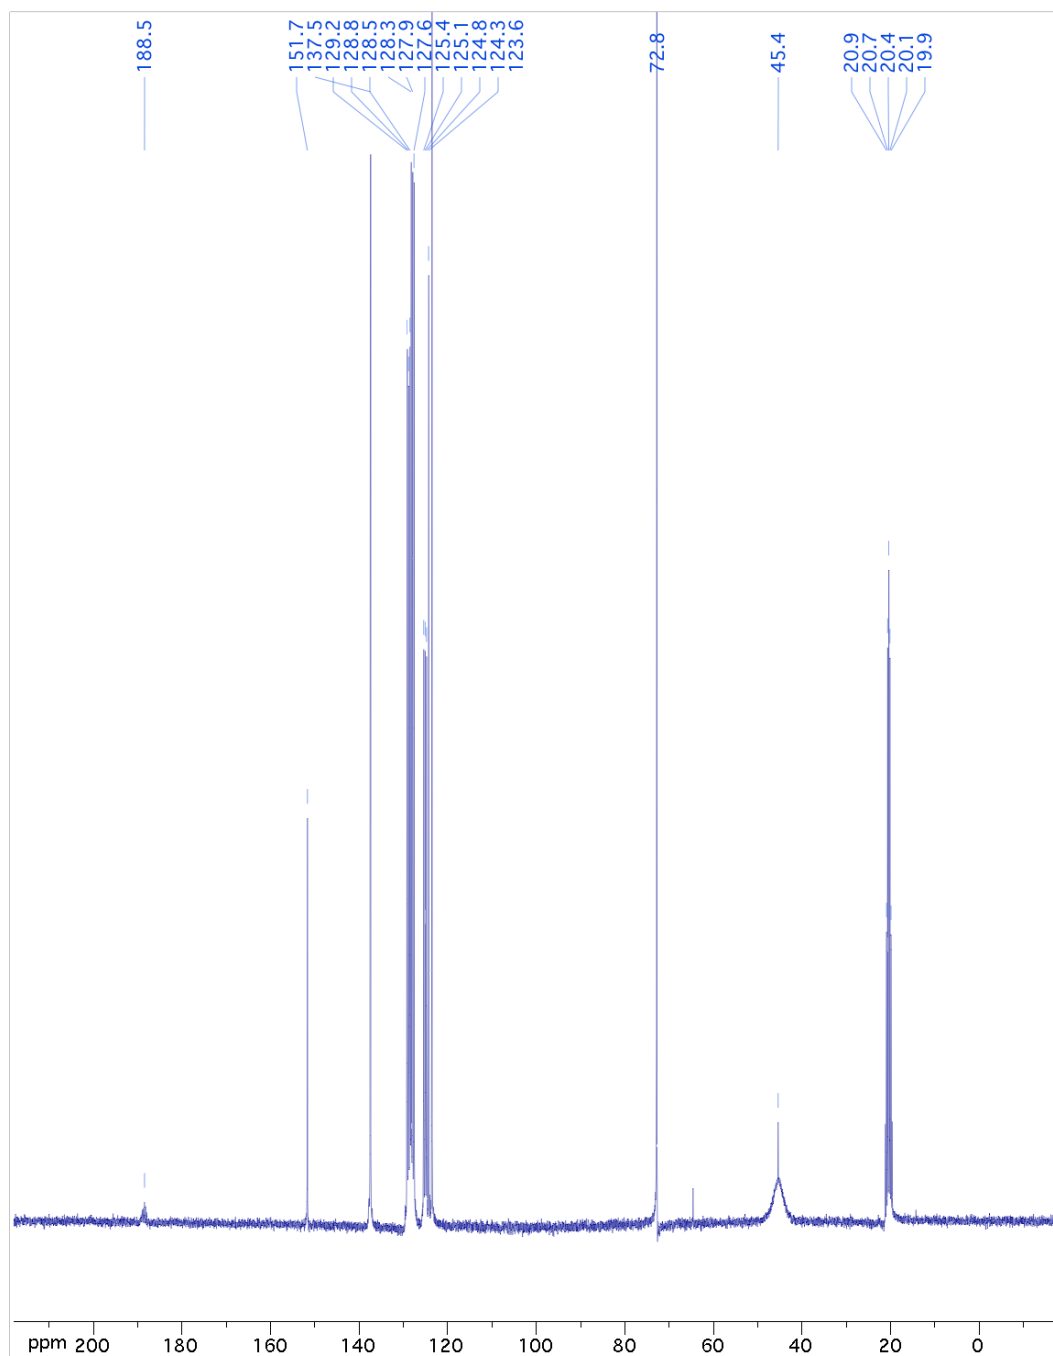

**Figure S5:**  $^{13}\text{C}\{^1\text{H}\}$  NMR spectrum of **3<sub>2</sub>** at RT.

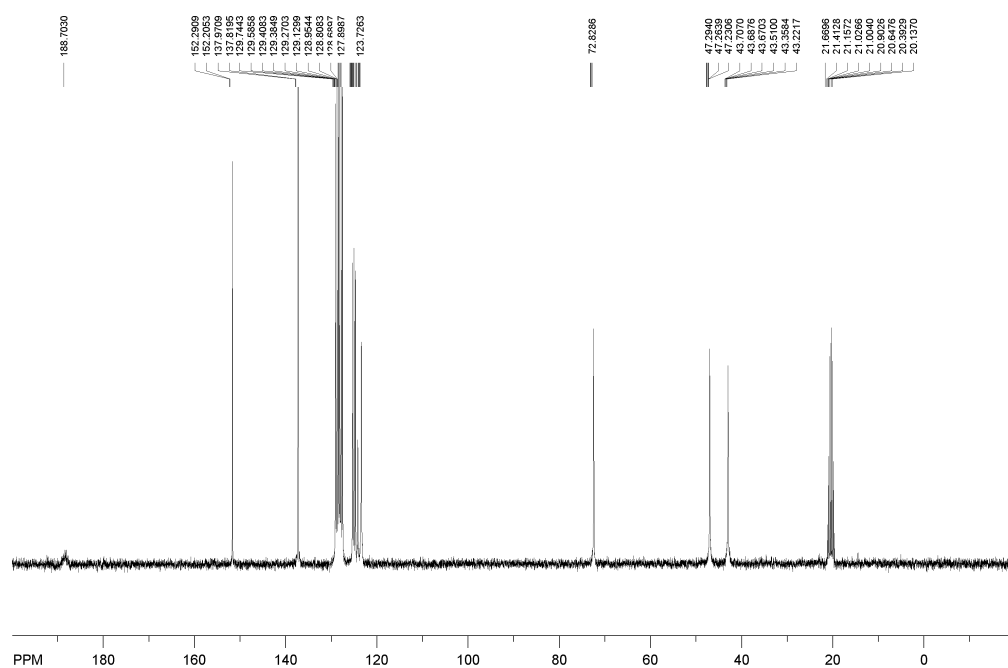

Figure S6:  $^{13}\text{C}\{^1\text{H}\}$  NMR spectrum of  $\mathbf{3}_2$  at  $-50^\circ\text{C}$ .

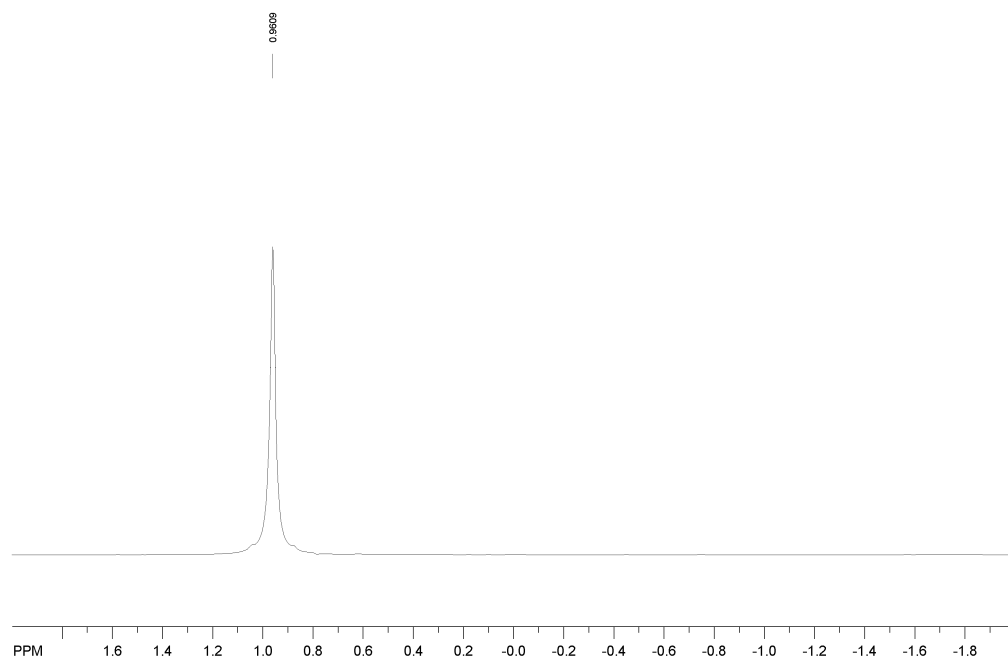

Figure S7:  $^7\text{Li}\{^1\text{H}\}$  NMR spectrum of  $\mathbf{3}_2$  at RT.

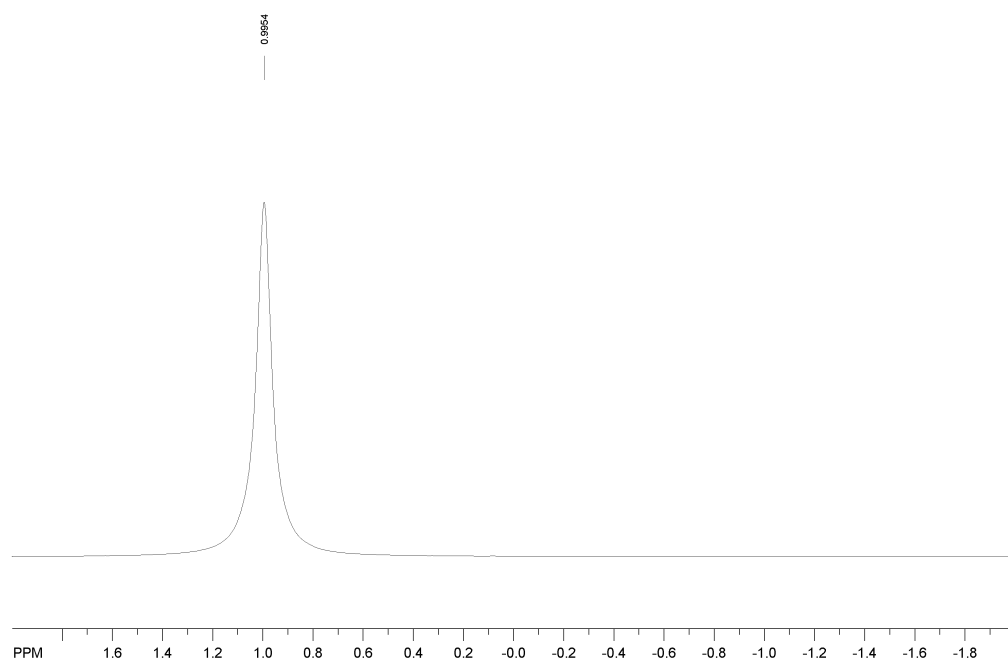

**Figure S8:**  ${}^7\text{Li}\{{}^1\text{H}\}$  NMR spectrum of  $\mathbf{3}_2$  at  $-50^\circ\text{C}$ .

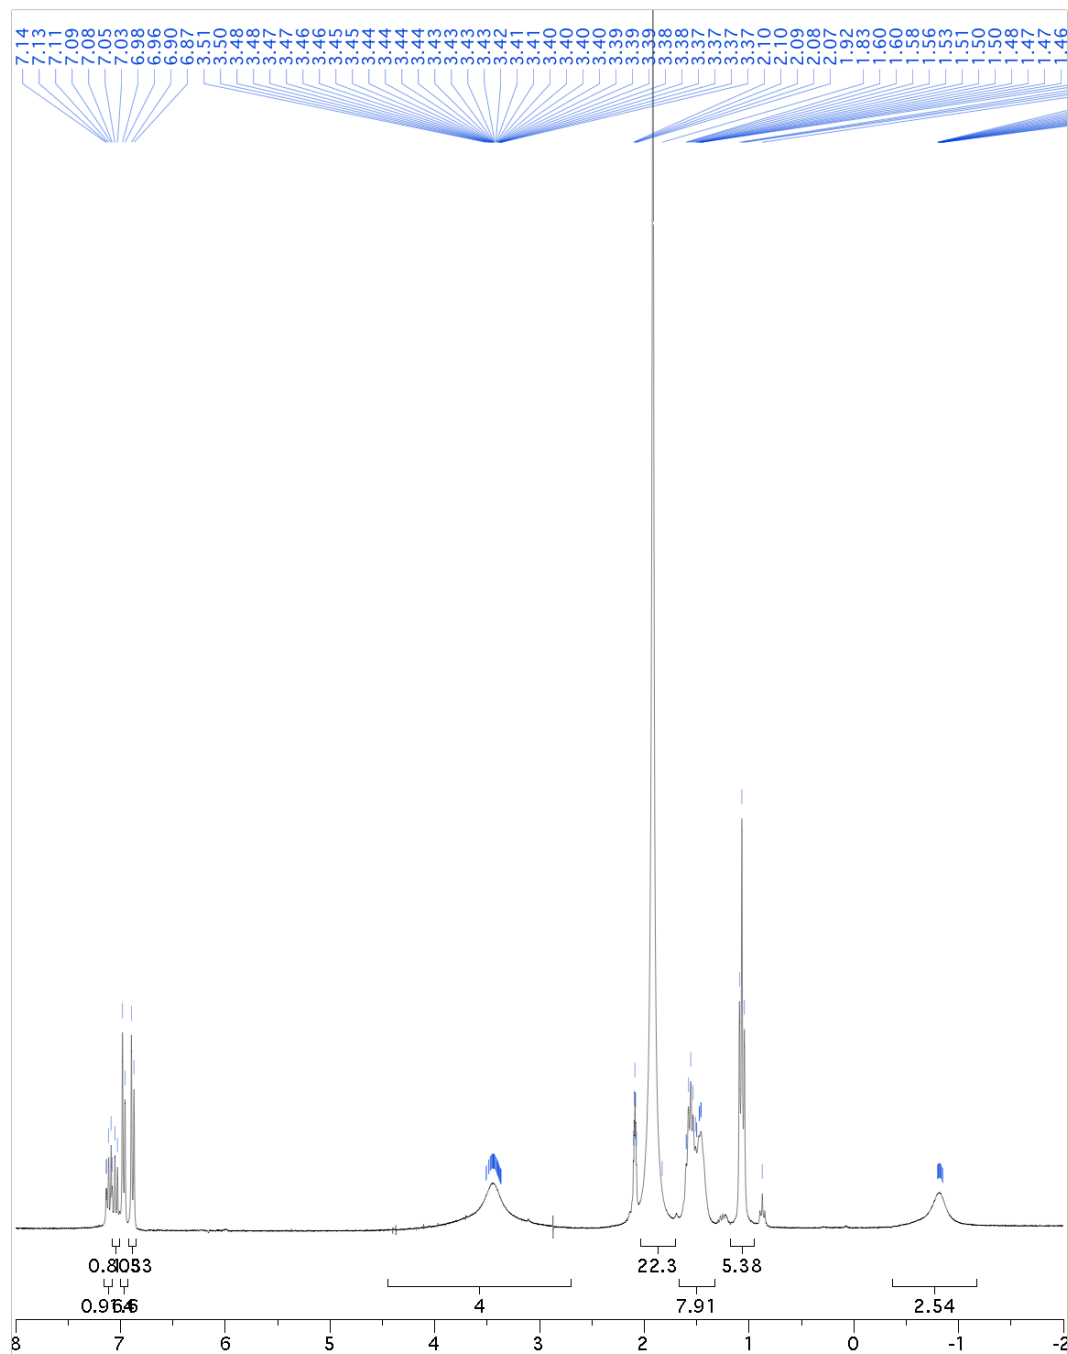

**Figure S9:**  $^1\text{H}$  NMR spectrum of 1:2 mixture of  $\mathbf{3}_2$  and  $n\text{BuLi}$  at RT.

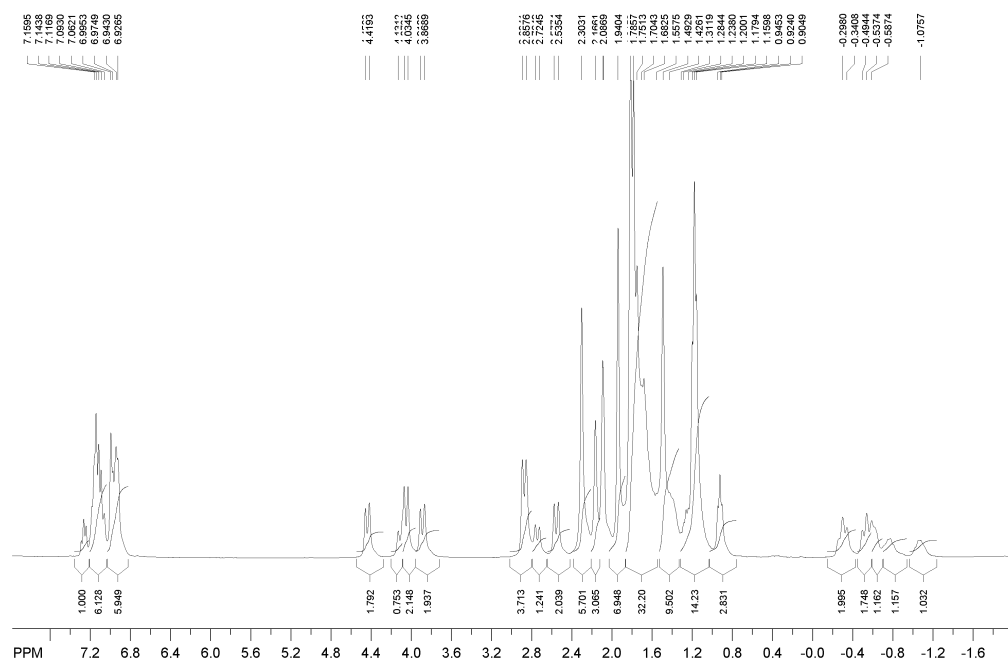

Figure S10:  $^1\text{H}$  NMR spectrum of 1:2 mixture of  $\mathbf{3}_2$  and  $n\text{BuLi}$  at  $-50^\circ\text{C}$ .

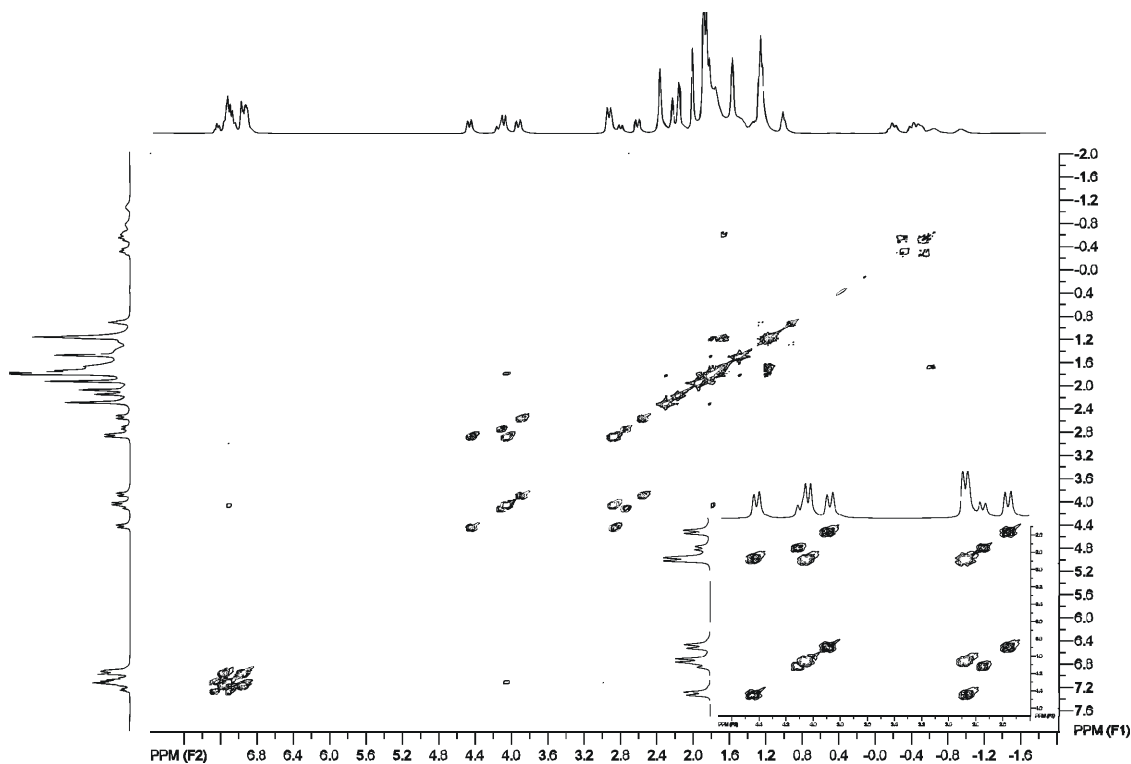

Figure S11:  $^1\text{H}$ - $^1\text{H}$  COSY NMR spectrum of 1:2 mixture of  $\mathbf{3}_2$  and  $n\text{BuLi}$  at  $-50^\circ\text{C}$ . Inset: expansion of benzylic  $\text{CH}_2$  region.

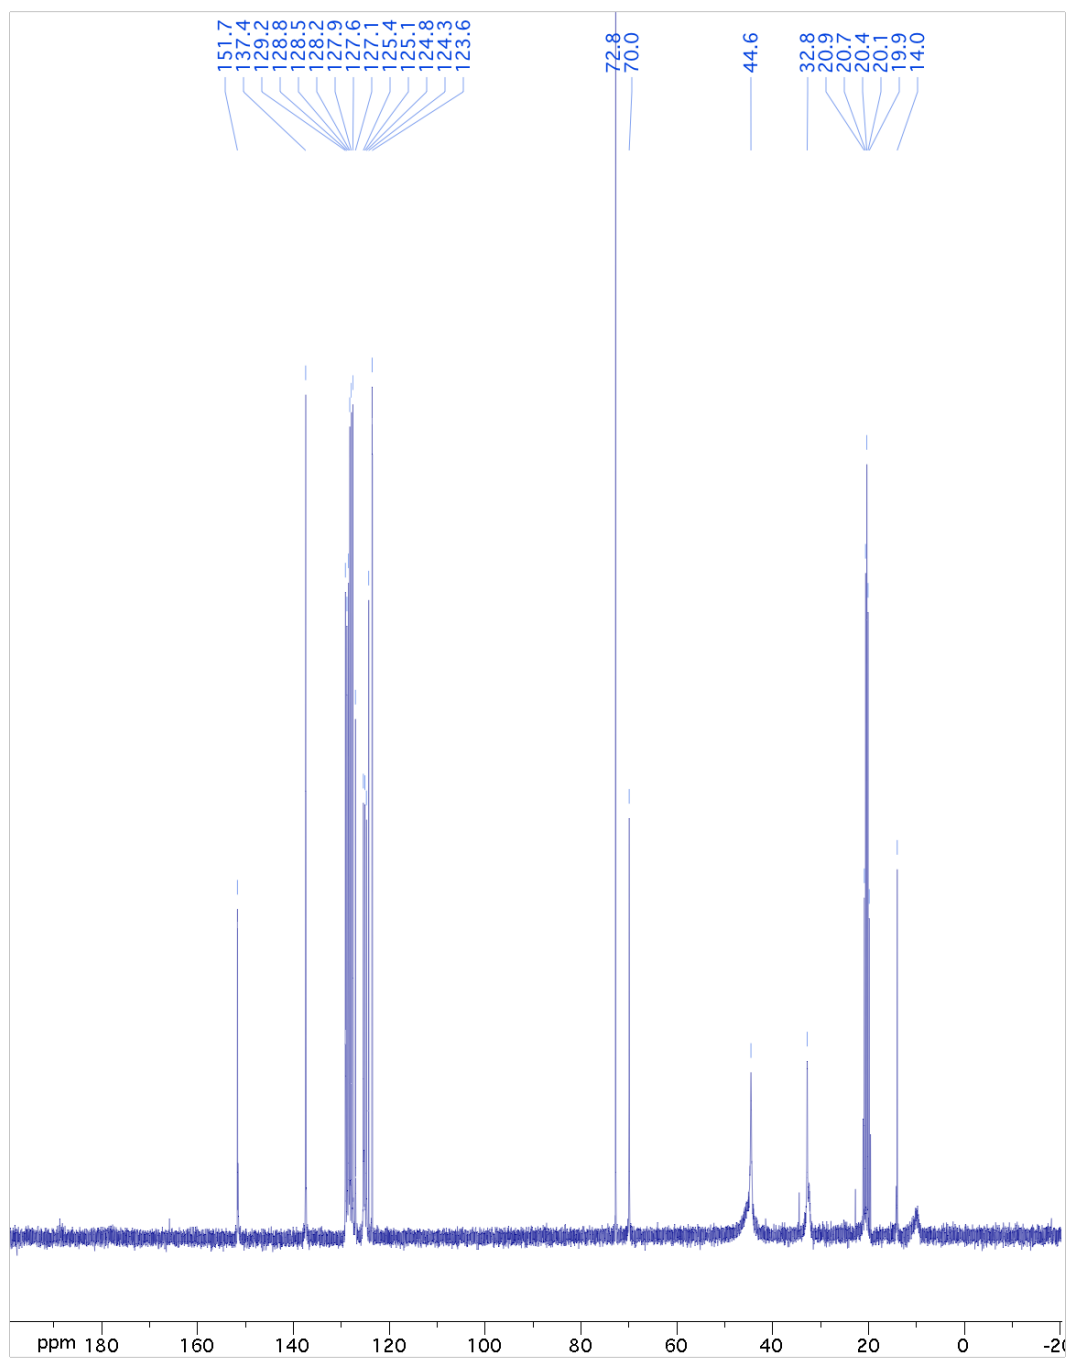

**Figure S12:**  $^{13}\text{C}\{^1\text{H}\}$  NMR spectrum of 1:2 mixture of  $\mathbf{3}_2$  and  $n\text{BuLi}$  at RT.

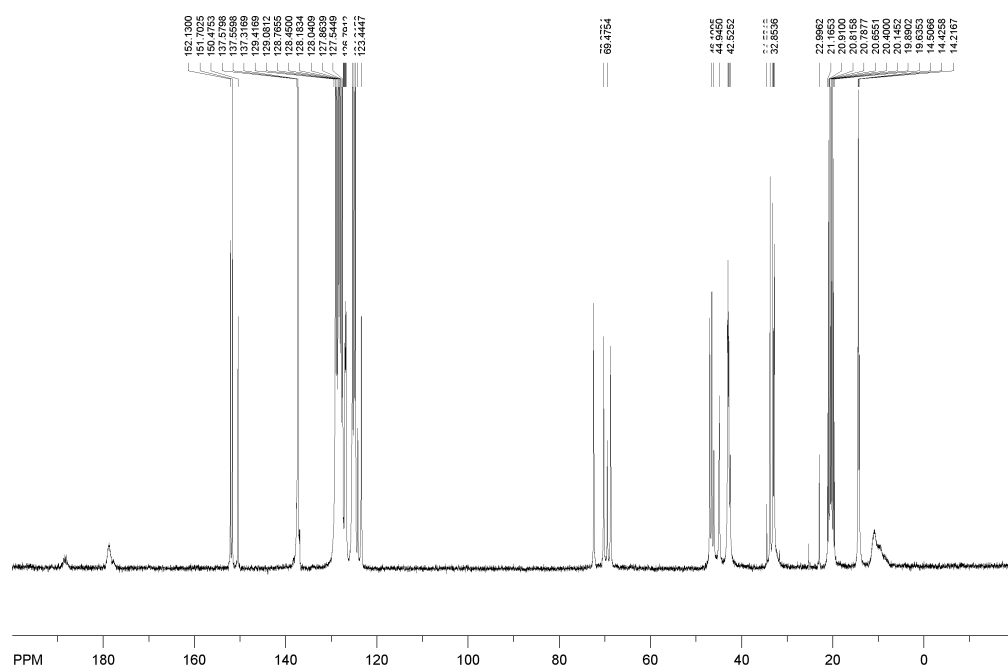

Figure S13:  $^{13}\text{C}\{^1\text{H}\}$  NMR spectrum of 1:2 mixture of  $\mathbf{3}_2$  and  $n\text{BuLi}$  at  $-50^\circ\text{C}$ .

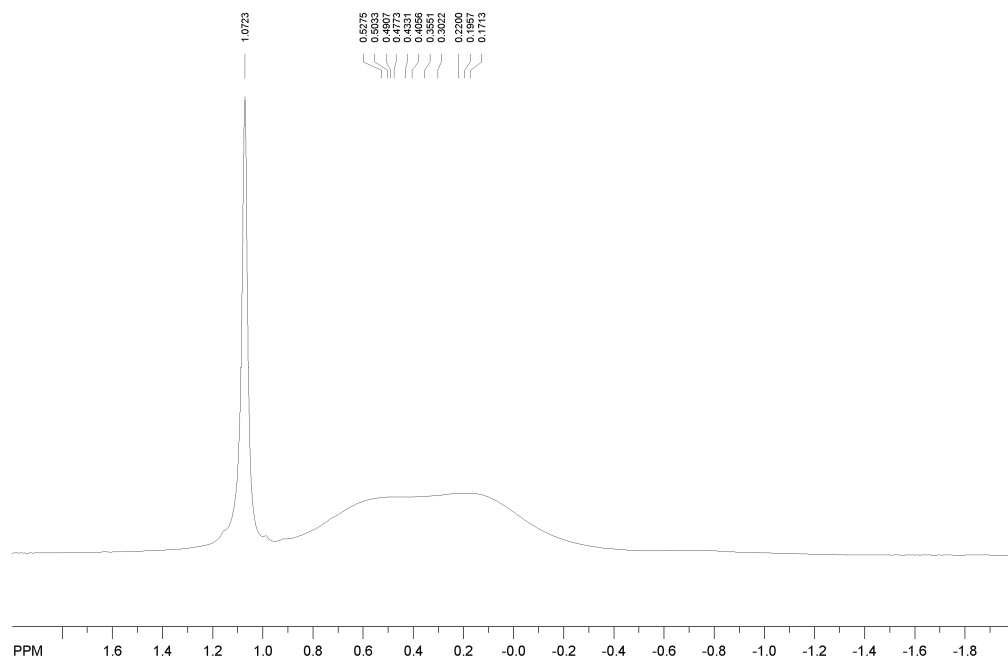

Figure S14:  $^7\text{Li}\{^1\text{H}\}$  NMR spectrum of 1:2 mixture of  $\mathbf{3}_2$  and  $n\text{BuLi}$  at RT.



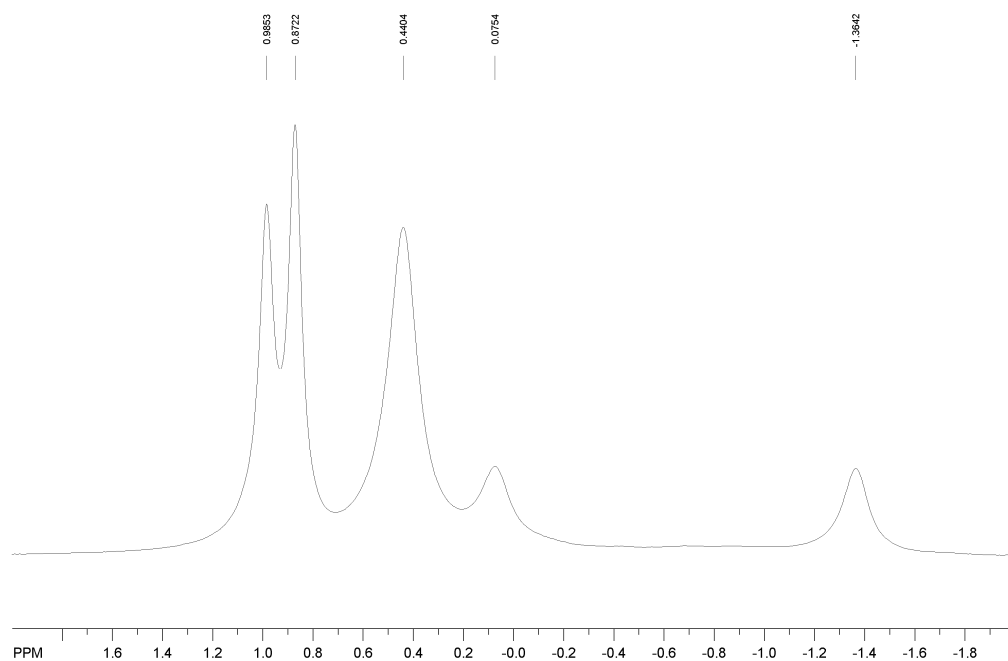

Figure S15:  ${}^7\text{Li}\{{}^1\text{H}\}$  NMR spectrum of 1:2 mixture of  $\mathbf{3}_2$  and  $n\text{BuLi}$  at  $-50^\circ\text{C}$ .

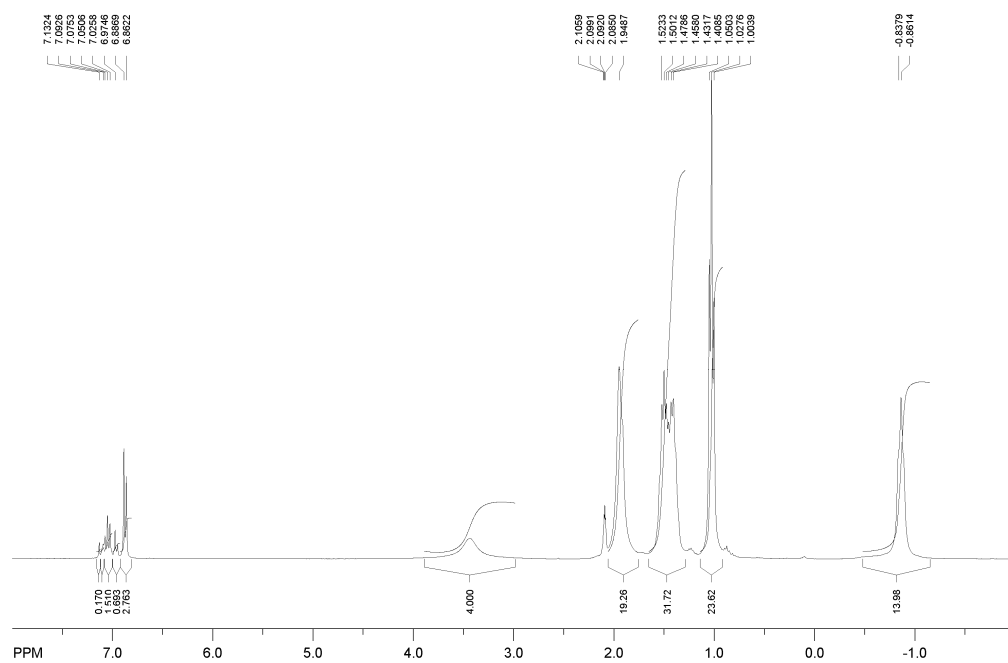

Figure S16:  ${}^1\text{H}$  NMR spectrum of 1:9 mixture of  $\mathbf{3}_2$  and  $n\text{BuLi}$  at RT.

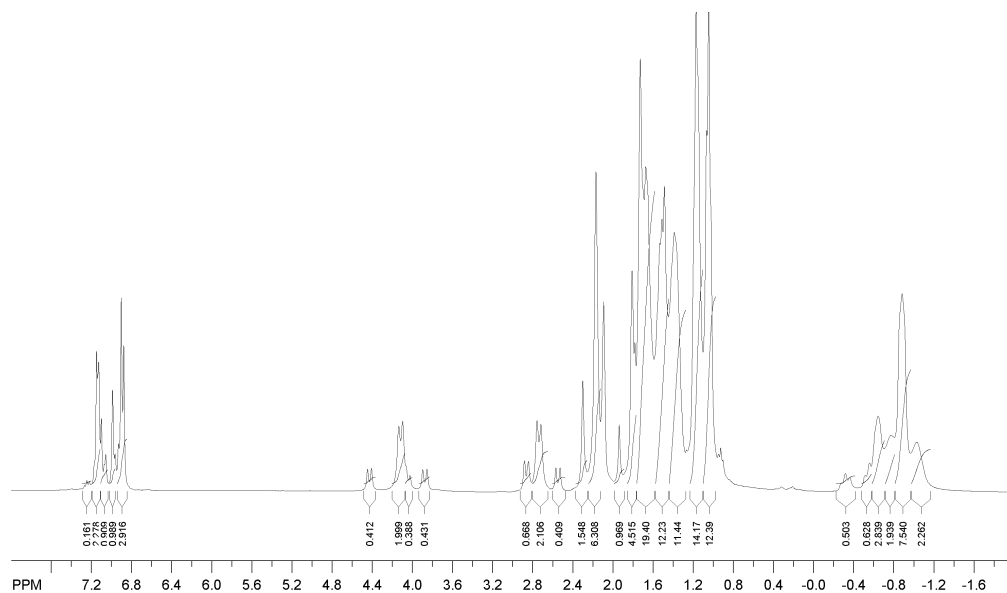

Figure S17:  $^1\text{H}$  NMR spectrum of 1:9 mixture of  $\mathbf{3}_2$  and  $n\text{BuLi}$  at  $-50^\circ\text{C}$ .

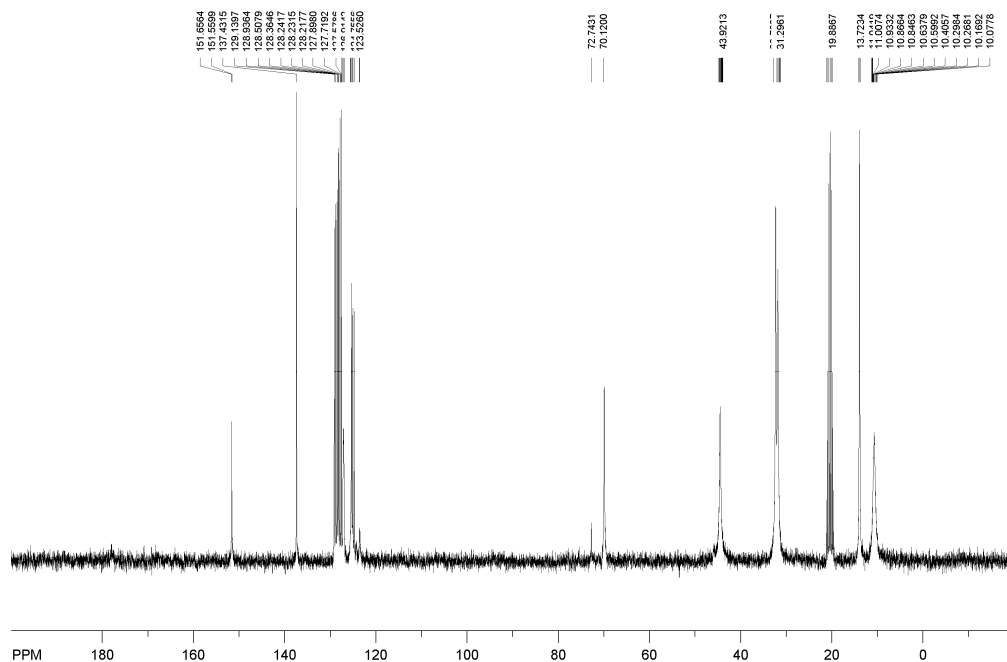

Figure S18:  $^{13}\text{C}\{^1\text{H}\}$  NMR spectrum of 1:9 mixture of  $\mathbf{3}_2$  and  $n\text{BuLi}$  at RT.

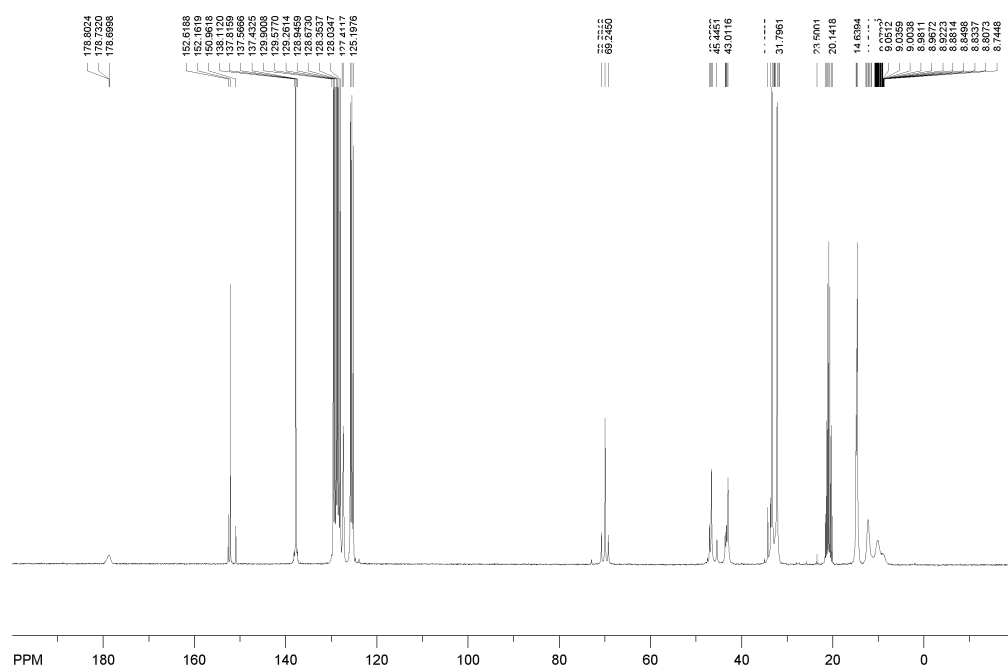

**Figure S19:**  $^{13}\text{C}\{^1\text{H}\}$  NMR spectrum of 1:9 mixture of  $\mathbf{3}_2$  and  $n\text{BuLi}$  at  $-50^\circ\text{C}$ .

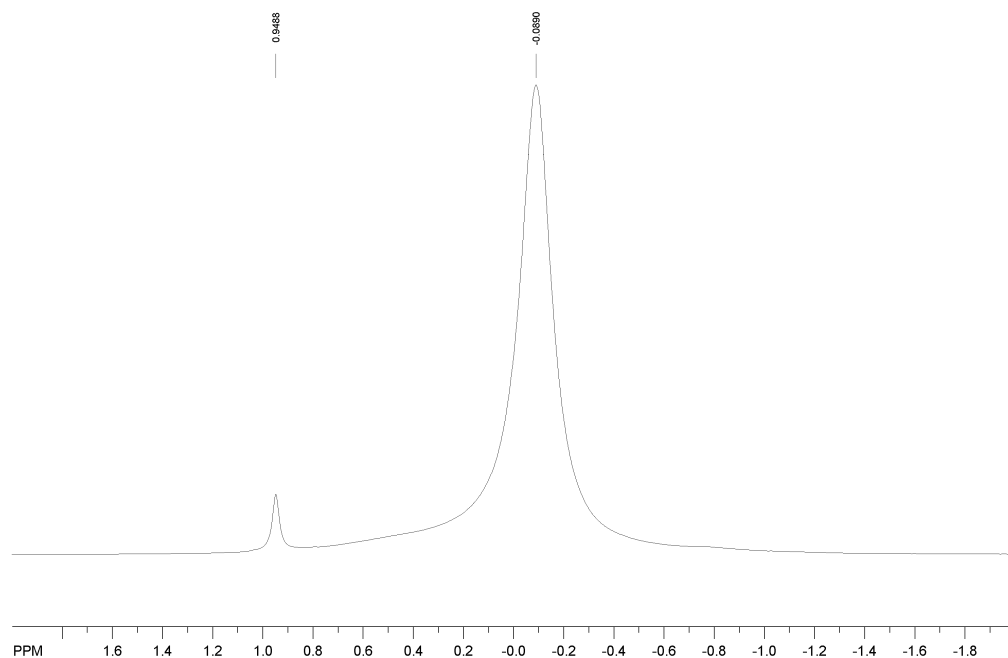

**Figure S20:**  $^7\text{Li}\{^1\text{H}\}$  NMR spectrum of 1:9 mixture of  $\mathbf{3}_2$  and  $n\text{BuLi}$  at RT.

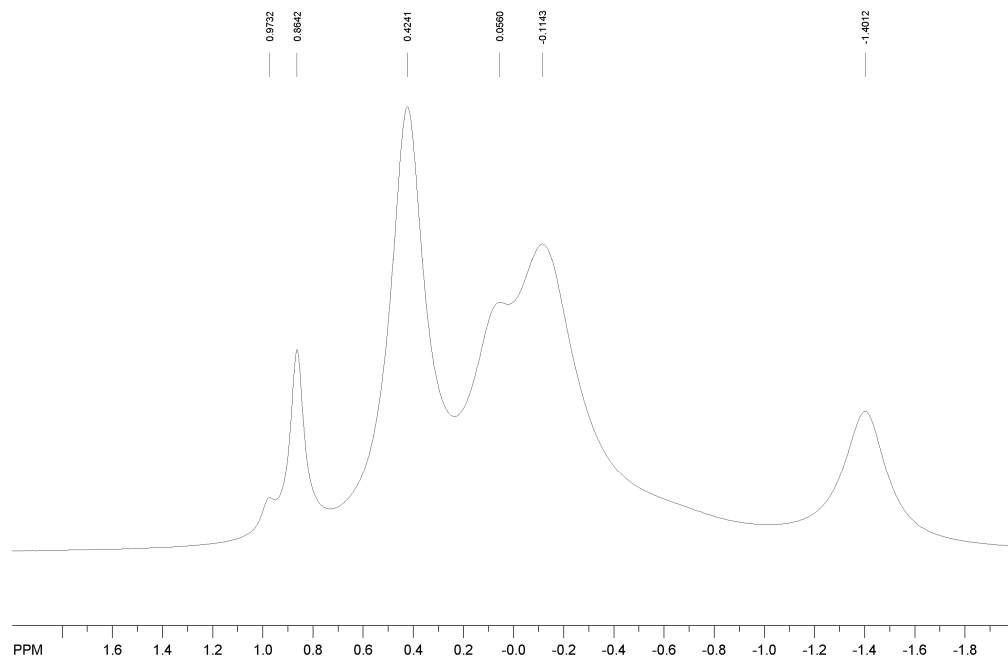

Figure S21:  ${}^7\text{Li}\{{}^1\text{H}\}$  NMR spectrum of 1:9 mixture of  $\mathbf{3}_2$  and  $n\text{BuLi}$  at  $-50^\circ\text{C}$ .

**Representative NMR spectra of aggregates containing  $[\text{Et}^-\text{NCN}]$  pincers ( $\mathbf{4}$ ):**

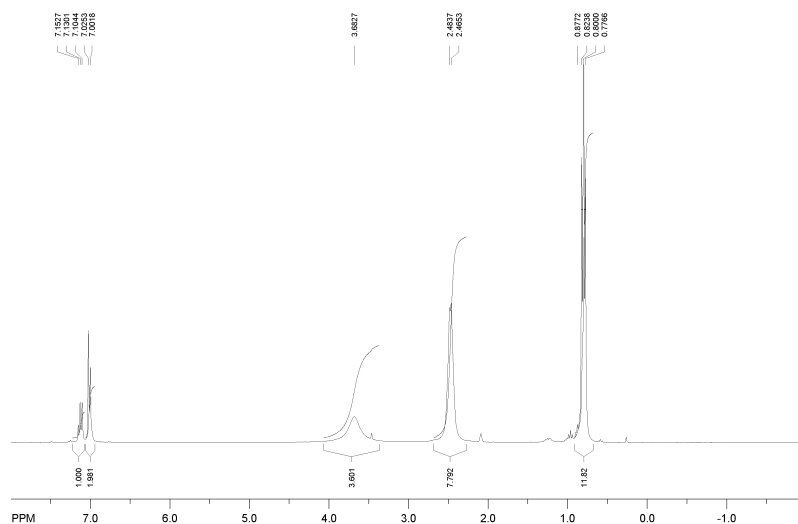

Figure S22:  ${}^1\text{H}$  NMR spectrum of  $\mathbf{4}_2$  at RT.



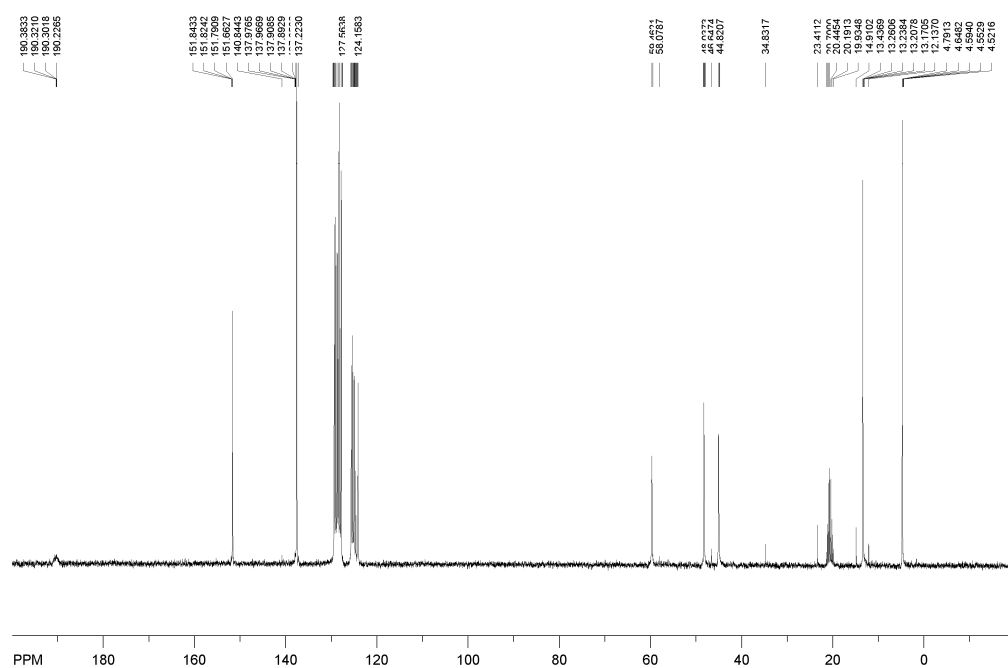

Figure S25:  $^{13}\text{C}\{^1\text{H}\}$  NMR spectrum of  $4_2$  at  $-60^\circ\text{C}$ .

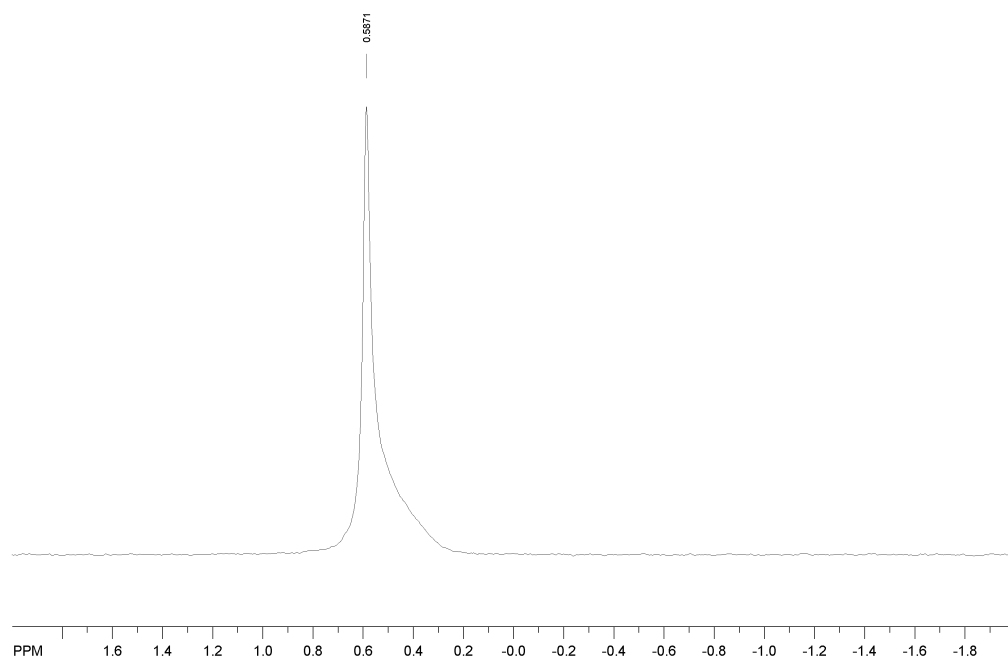

Figure S26:  $^7\text{Li}\{^1\text{H}\}$  NMR spectrum of  $4_2$  at RT.

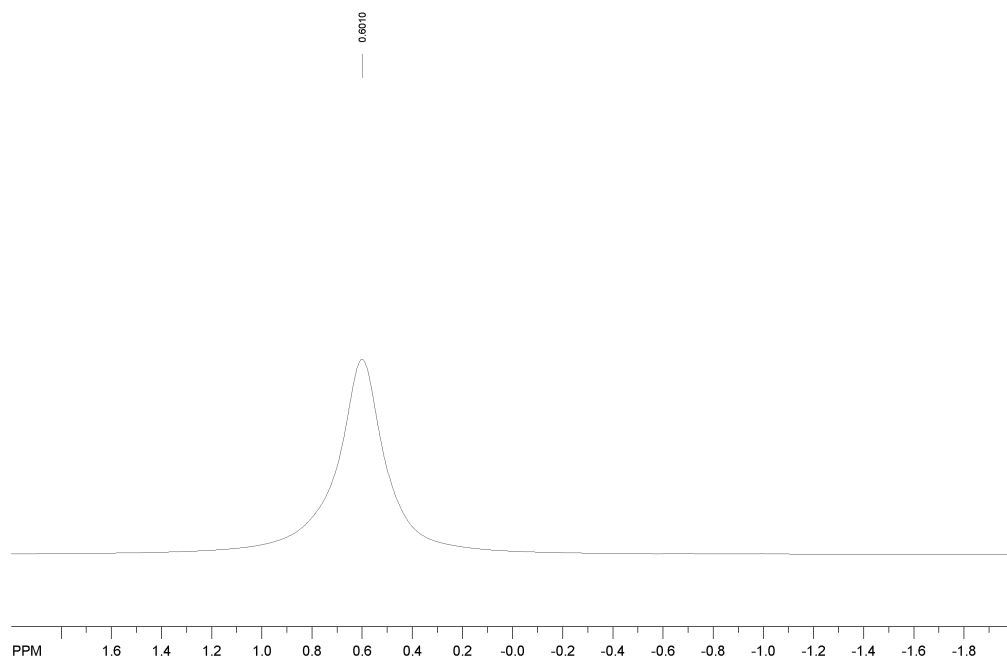

Figure S27: <sup>7</sup>Li{<sup>1</sup>H} NMR spectrum of **4**<sub>2</sub> at -60°C.

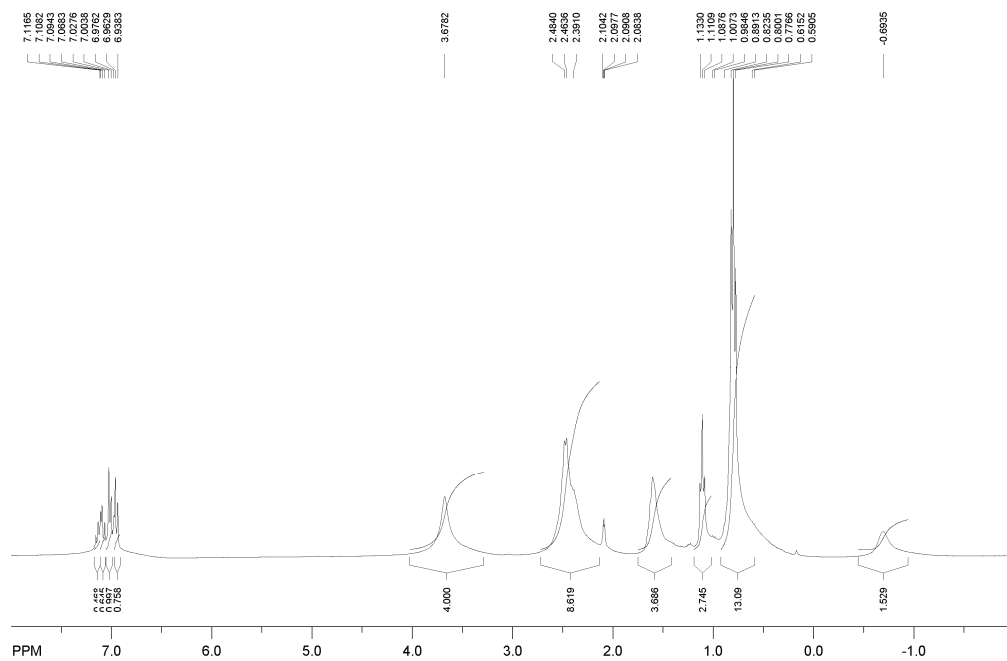

Figure S28: <sup>1</sup>H NMR spectrum of 1:2 mixture of **4**<sub>2</sub> and *n*BuLi at RT.

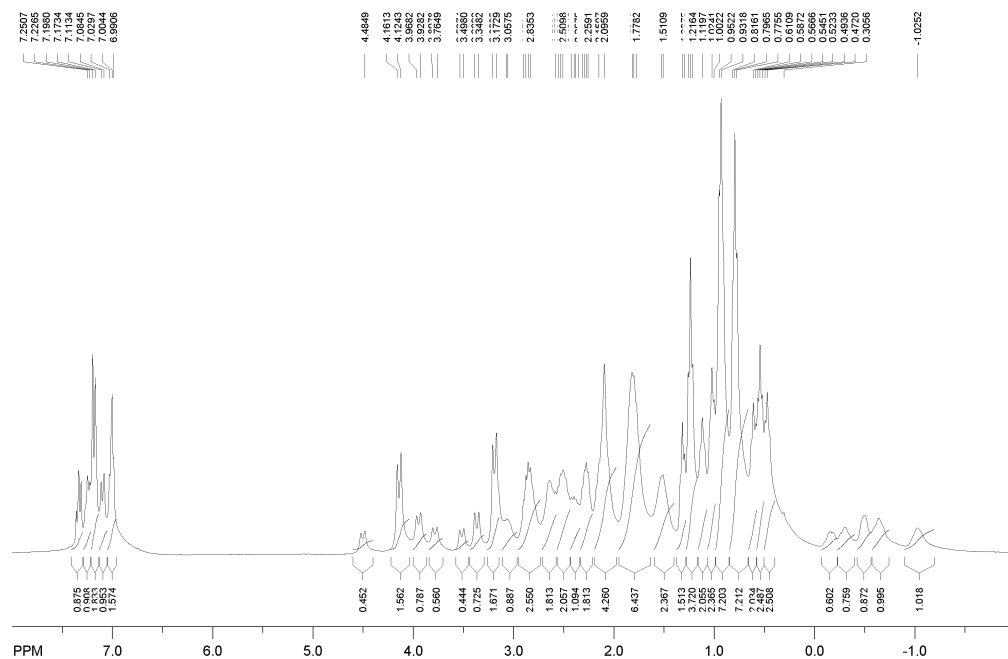

Figure S29:  $^1\text{H}$  NMR spectrum of 1:2 mixture of  $\mathbf{4}_2$  and  $n\text{BuLi}$  at  $-60^\circ\text{C}$ .

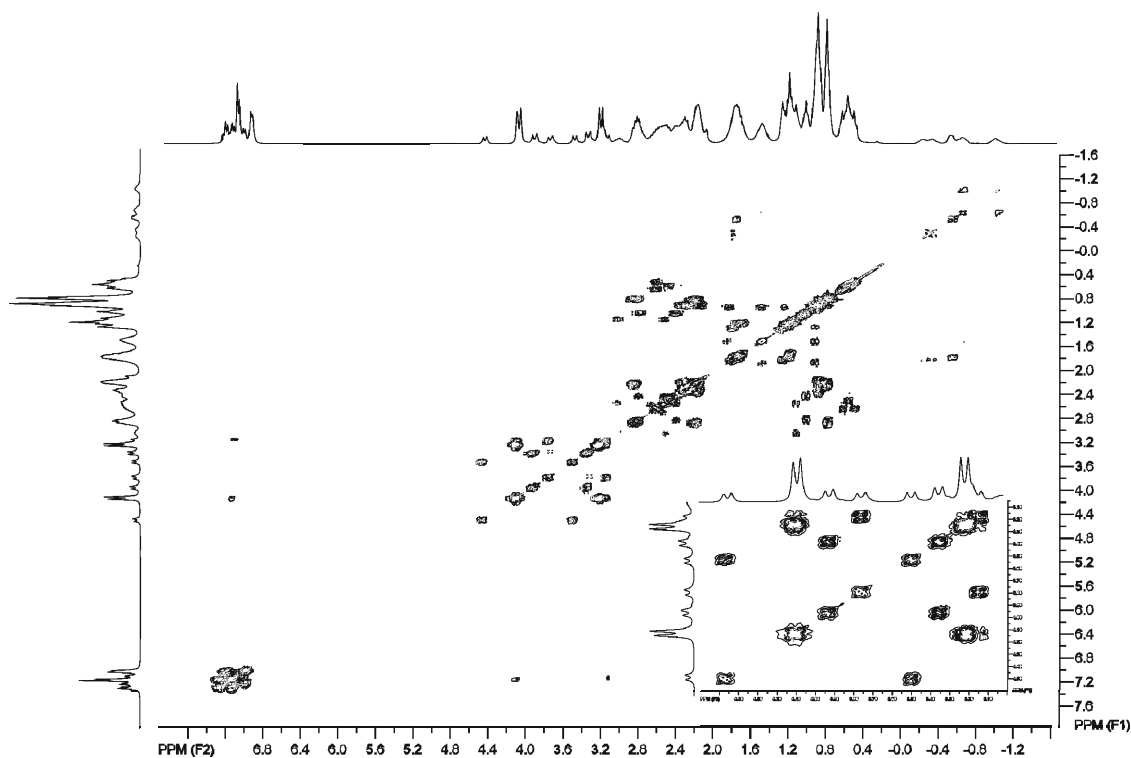

Figure S30:  $^1\text{H}$ - $^1\text{H}$  COSY NMR spectrum of 1:2 mixture of  $\mathbf{4}_2$  and  $n\text{BuLi}$  at  $-60^\circ\text{C}$ . Inset: expansion of benzylic  $\text{CH}_2$  region.



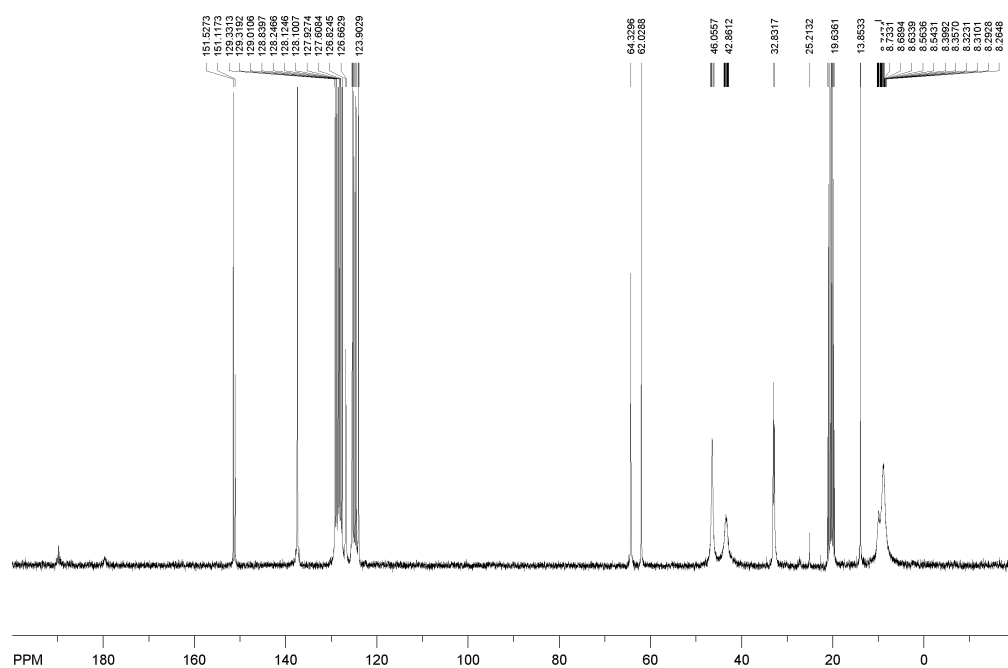

Figure S31:  $^{13}\text{C}\{^1\text{H}\}$  NMR spectrum of 1:2 mixture of  $4_2$  and  $n\text{BuLi}$  at RT.

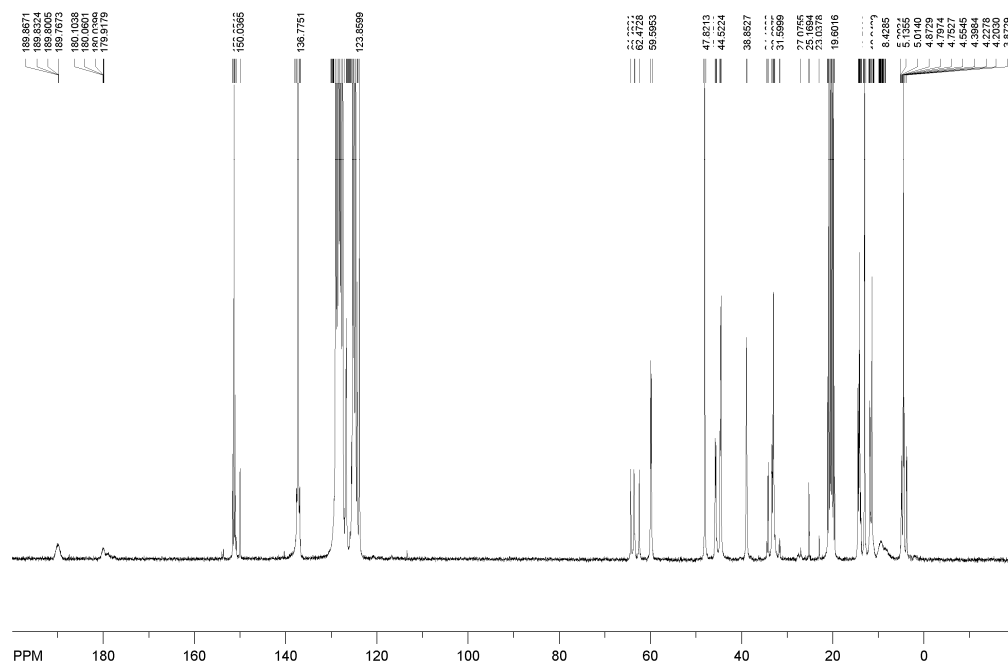

Figure S32:  $^{13}\text{C}\{^1\text{H}\}$  NMR spectrum of 1:2 mixture of  $4_2$  and  $n\text{BuLi}$  at  $-60^\circ\text{C}$ .

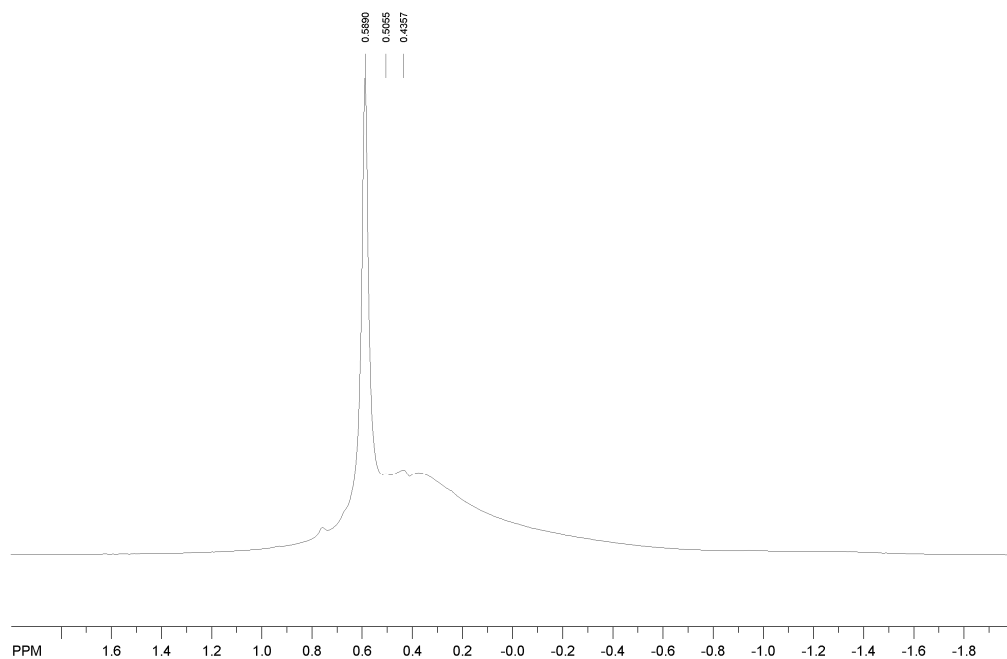

**Figure S33:**  $^7\text{Li}$  NMR spectrum of 1:2 mixture of  $\mathbf{4}_2$  and  $n\text{BuLi}$  at RT.

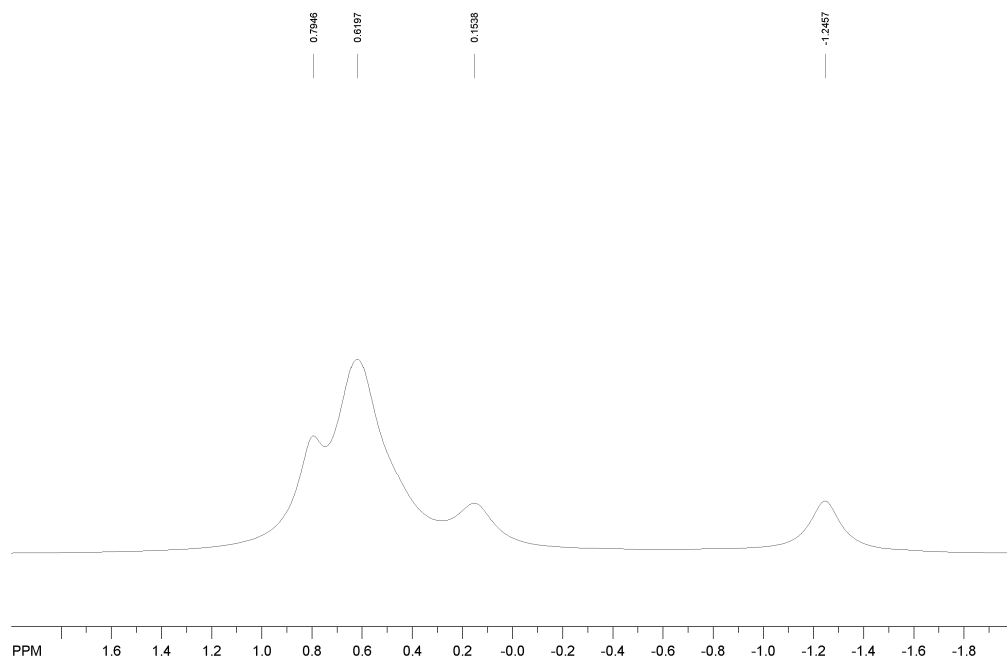

**Figure S34:**  $^7\text{Li}$  NMR spectrum of 1:2 mixture of  $\mathbf{4}_2$  and  $n\text{BuLi}$  at  $-60^\circ\text{C}$ .

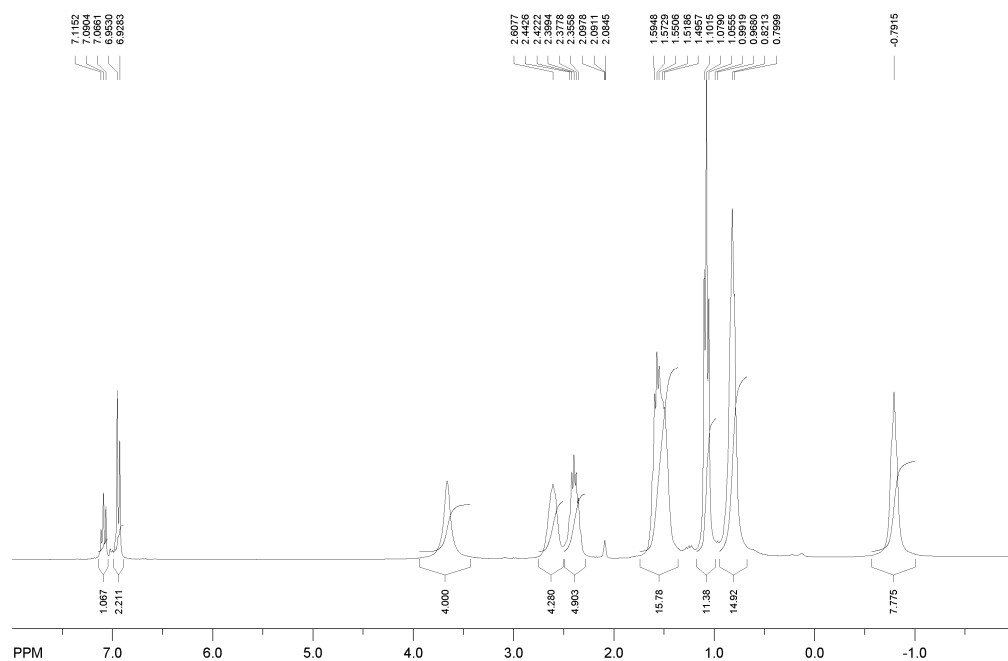

Figure S35:  $^1\text{H}$  NMR spectrum of 1:8 mixture of  $\mathbf{4}_2$  and  $n\text{BuLi}$  at RT.

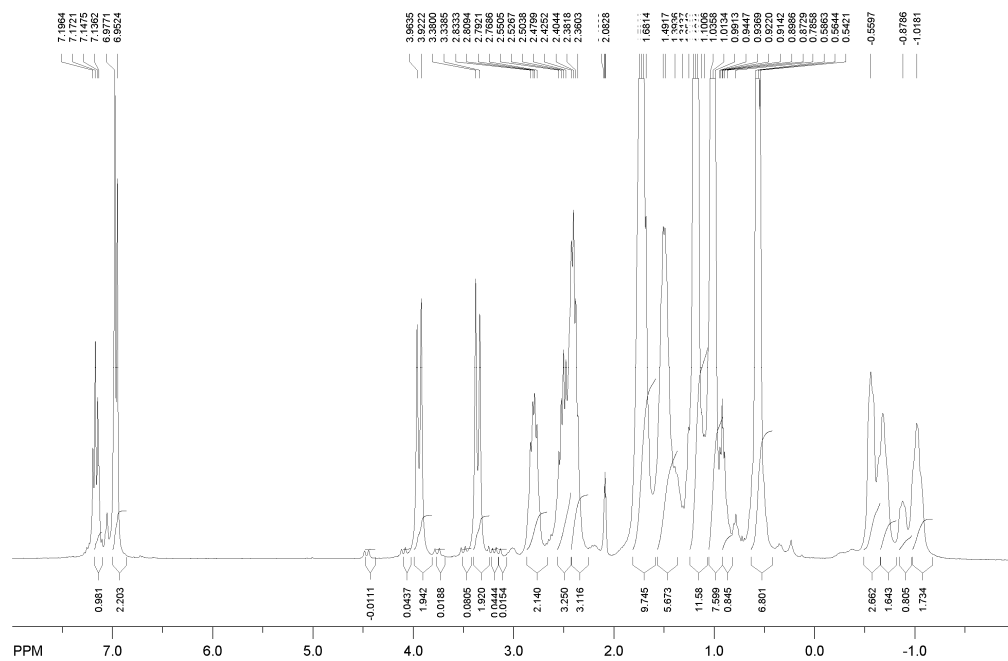

Figure S36:  $^1\text{H}$  NMR spectrum of 1:8 mixture of  $\mathbf{4}_2$  and  $n\text{BuLi}$  at  $-50^\circ\text{C}$ .

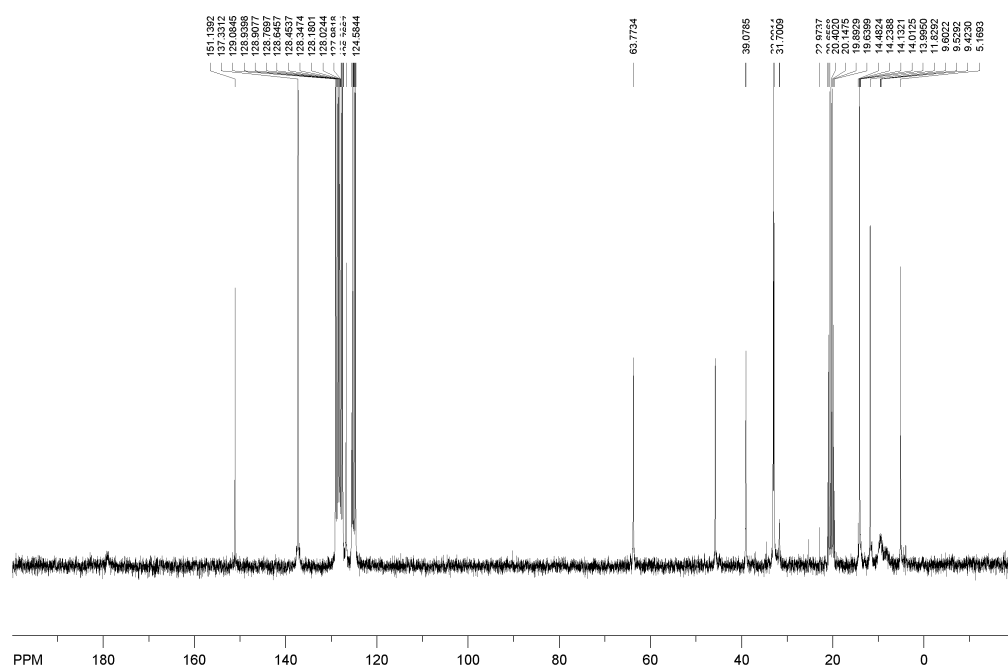

Figure S37:  $^{13}\text{C}\{^1\text{H}\}$  NMR spectrum of 1:8 mixture of  $4_2$  and  $n\text{BuLi}$  at  $-50^\circ\text{C}$ .

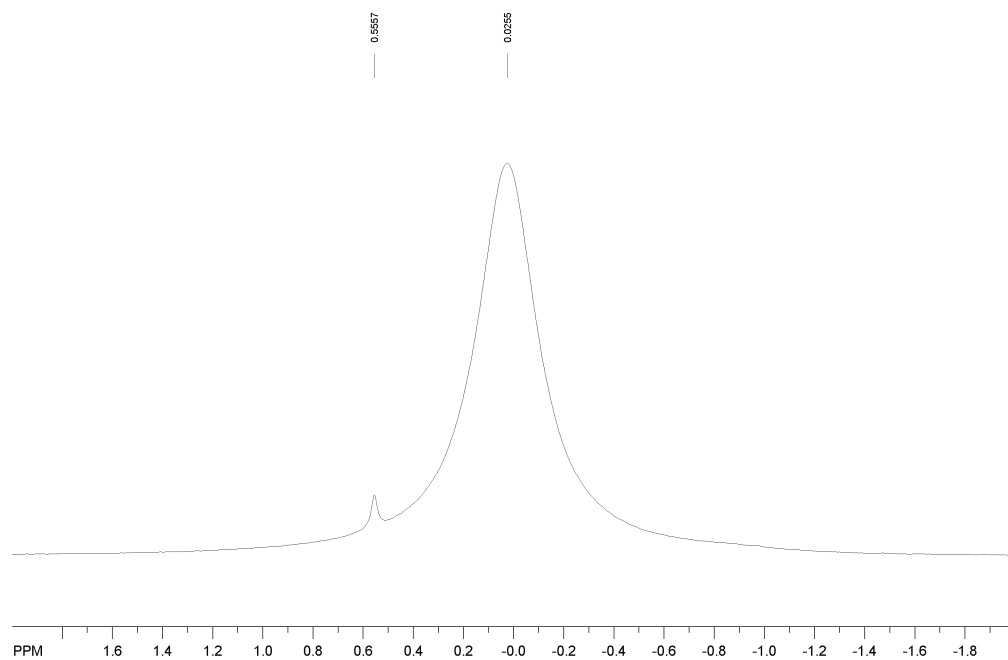

Figure S38:  $^7\text{Li}\{^1\text{H}\}$  NMR spectrum of 1:8 mixture of  $4_2$  and  $n\text{BuLi}$  at RT.

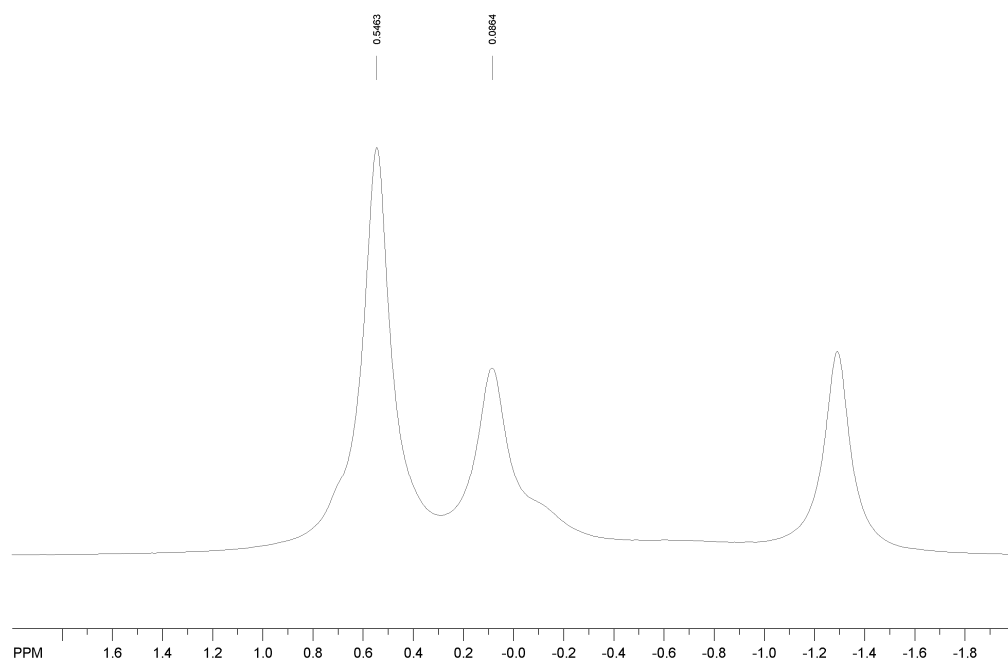

**Figure S39:**  ${}^7\text{Li}\{{}^1\text{H}\}$  NMR spectrum of 1:8 mixture of **4<sub>2</sub>** and *n*BuLi at -50°C.
